# 1 **SARS-CoV-2 booster vaccination rescues attenuated IgG1 memory B** 2 **cell response in primary antibody deficiency patients**

3  
4 Frank J. Lin<sup>1,9</sup>, Alexa Michelle Altman Doss<sup>2,9</sup>, Hannah G. Davis-Adams<sup>1</sup>, Lucas J. Adams<sup>3</sup>,  
5 Christopher H. Hanson<sup>1</sup>, Laura A. VanBlargan<sup>1</sup>, Chieh-Yu Liang<sup>1,3</sup>, Rita. E. Chen<sup>1,3</sup>, Jennifer Marie  
6 Monroy<sup>1</sup>, H. James Wedner<sup>1</sup>, Anthony Kulczycki<sup>1</sup>, Tarisa L. Mantia<sup>1</sup>, Caitlin C. O’Shaughnessy<sup>1</sup>,  
7 Saravanan Raju<sup>3</sup>, Fang R. Zhao<sup>1</sup>, Elise Rizzi<sup>1</sup>, Christopher J. Rigell<sup>1</sup>, Tiffany Bason Dy<sup>1</sup>, Andrew  
8 L. Kau<sup>1,4</sup>, Zhen Ren<sup>1</sup>, Jackson Turner<sup>3</sup>, Jane A. O’Halloran<sup>1</sup>, Rachel M. Presti<sup>1, 6</sup>, Daved H.  
9 Fremont<sup>3</sup>, Peggy L. Kendall<sup>1</sup>, Ali H. Ellebedy<sup>3, 5, 6</sup>, Philip A. Mudd<sup>6, 8</sup>, Michael S. Diamond<sup>1,3,5,6, 7</sup>,  
10 Ofer Zimmerman<sup>\*1</sup>, and Brian J. Laidlaw<sup>\*1</sup>

## 11 12 13 **Affiliations:**

14 <sup>1</sup> Department of Medicine, Washington University School of Medicine, St. Louis, MO, USA.

15 <sup>2</sup> Department of Pediatrics, Washington University School of Medicine, St. Louis, MO, USA.

16 <sup>3</sup> Department of Pathology and Immunology, Washington University School of Medicine, St. Louis,  
17 MO, USA.

18 <sup>4</sup> Center for Women’s Infectious Disease Research, Washington University School of Medicine,  
19 St. Louis, MO, USA.

20 <sup>5</sup> The Andrew M. and Jane M. Bursky Center for Human Immunology & Immunotherapy  
21 Programs, Washington University School of Medicine, Saint Louis, MO, USA.

22 <sup>6</sup> Center for Vaccines and Immunity to Microbial Pathogens, Washington University School of  
23 Medicine, Saint Louis, MO, USA.

24 <sup>7</sup> Department of Molecular Microbiology, Washington University School of Medicine, St. Louis,  
25 MO, USA.

26 <sup>8</sup> Department of Emergency Medicine, Washington University School of Medicine, St. Louis, MO,  
27 USA.

28 <sup>9</sup> These authors contributed equally

29  
30 \* Correspondence should be addressed to Brian Laidlaw ([brian.laidlaw@wustl.edu](mailto:brian.laidlaw@wustl.edu)) and Ofer  
31 Zimmerman ([zimmero@wustl.edu](mailto:zimmero@wustl.edu))

32

33 **ABSTRACT**

34 SARS-CoV-2 vaccines have proven effective in eliciting an immune response capable of providing  
35 protective immunity in healthy individuals. However, whether SARS-CoV-2 vaccination induces a  
36 long-lived immune response in immunocompromised individuals is poorly understood. Primary  
37 antibody deficiency (PAD) syndromes are among the most common immunodeficiency disorders  
38 in adults and are characterized by an impaired ability to mount robust antibody responses  
39 following infection or vaccination. Here, we present data from a prospective study in which we  
40 analyzed the B and T cell response in PAD patients following SARS-COV-2 vaccination.  
41 Unexpectedly, individuals with PAD syndromes mounted a SARS-CoV-2 specific B and CD4<sup>+</sup> T  
42 cell response that was comparable in magnitude to healthy individuals. Many individuals with PAD  
43 syndromes displayed reduced IgG1<sup>+</sup> and CD11c<sup>+</sup> memory B cell responses following the primary  
44 vaccination series. However, the IgG1 class-switching defect was largely rescued following  
45 mRNA booster vaccination. Boosting also elicited an increase in the SARS-CoV-2-specific B and  
46 T cell response and the development of Omicron-specific memory B cells in COVID-19-naïve  
47 PAD patients. Together, these data indicate that SARS-CoV-2 vaccines elicit memory B and T  
48 cells in PAD patients that may contribute to long-term protective immunity.

## 49 INTRODUCTION

50 Severe acute respiratory syndrome coronavirus 2 (SARS-CoV-2) is the causative agent of  
51 COVID-19 and has infected more than 500 million individuals resulting in over 6 million deaths as  
52 of June 2022. The mRNA-based Pfizer-BioNTech (BNT162b2) and Moderna (mRNA-1273) and  
53 the vector-based Johnson & Johnson (Ad26.COV2.S) SARS-CoV-2 vaccines are approved for  
54 use in the United States and have demonstrated efficacy in preventing symptomatic and  
55 asymptomatic infection (1–7). Although SARS-CoV-2-specific antibody titers wane over time, a  
56 durable cellular immune response is detectable for at least 6 months following completion of the  
57 primary vaccination series (8). The administration of an mRNA booster vaccine dose leads to a  
58 rapid increase in antibody titers and enables robust neutralization of viral variants, including  
59 Omicron (B.1.1.529), which can evade immunity elicited by the primary vaccination (9–12).

60  
61 Individuals with medical conditions that compromise their ability to mount immune responses,  
62 such as primary and secondary immunodeficiencies, are at increased risk for severe illness and  
63 death following SARS-CoV-2 infection (13, 14). Patients with primary and secondary  
64 immunodeficiencies also have an impaired SARS-CoV-2-specific antibody response following a  
65 primary vaccination series (15–24). Moderately or severely immunosuppressed patients are  
66 recommended by the Centers for Disease Control and Prevention (CDC) to receive a third dose  
67 as part of their primary series against SARS-CoV-2 and a fourth dose at least 3 months following  
68 the completion of the primary vaccination series. Administration of booster doses leads to an  
69 increased SARS-CoV-2-specific antibody response in immunocompromised individuals (17, 24).

70  
71 Primary antibody deficiency (PAD) syndromes are the most common symptomatic primary  
72 immunodeficiency in adults and are characterized by an impaired ability to mount an antibody  
73 response following infection or vaccination (25). The etiology of PAD syndromes is unknown in  
74 most patients, with only 25-35% of cases explained by inborn errors of immunity (26–30).  
75 Individuals with PAD syndromes are at increased risk of recurrent and severe infections,  
76 autoimmunity, allergic disease, and cancer (25). Most individuals with PAD syndromes receive  
77 intravenous or subcutaneous immunoglobulin replacement therapy every 1 to 4 weeks to reduce  
78 the frequency and severity of infections (31). However, immunoglobulin replacement therapy  
79 consists of immunoglobulin donated up to one year earlier and is unlikely to contain high titers of  
80 neutralizing antibodies specific for the strain of SARS-CoV-2 that is dominant at the time of  
81 administration (24, 32, 33).

82

83 We previously found that COVID-19-naïve individuals with PAD syndromes had a reduced SARS-  
84 CoV-2-specific antibody response following vaccination relative to healthy donors (24). The  
85 administration of a booster vaccine dose increased the antibody response and led to the  
86 development of antibodies with an enhanced ability to neutralize the Delta (B.1.617.2) and  
87 Omicron variants (24). However, the total and neutralizing antibody titers markedly declined by  
88 day 90 post-boost suggesting that the endogenous antibody response may be insufficient to  
89 mediate long-term protective immunity in individuals with PAD syndromes (24). In this study, we  
90 performed a prospective analysis of the SARS-CoV-2-specific B and T cell response following  
91 SARS-CoV-2 primary and booster vaccination in PAD patients. Unexpectedly, we found that most  
92 individuals with PAD syndromes generated a memory B and T cell response that was comparable  
93 in magnitude to the response in healthy donors following the primary vaccination series.  
94 Administration of a booster dose led to a further enhancement in B and T cell responses, including  
95 the development of Omicron-specific B cells. This work provides important insight into the  
96 capacity of memory B and T cells to contribute to protective immunity in PAD patients.

97

## 98 **RESULTS**

99 **Individuals with PAD syndromes display a similar memory B cell response to healthy**  
100 **controls following primary vaccination series.** We assessed the SARS-CoV-2-specific B and  
101 CD4<sup>+</sup> T cell response following vaccination in peripheral blood mononuclear cells (PBMCs) from  
102 a cohort of 30 individuals with PAD syndrome (n=20 common variable immunodeficiency (CVID),  
103 n=4 hypogammaglobulinemia, n=6 specific antibody deficiency) (**Fig. 1a, Table S1**). This cohort  
104 completed their primary vaccination series (n=19 Pfizer-BioNTech BNT162b2, n=8 Moderna  
105 mRNA-1273, n=3 J&J Ad26.COV2.S) with 9 of these individuals having a real time-polymerase  
106 chain reaction (RT-PCR)-confirmed history of prior COVID-19 infection that occurred 36 to 276  
107 days prior to vaccination. 19 of these individuals subsequently received a booster vaccine dose  
108 (n=16 BNT162b2, n=3 mRNA-1273). PBMCs were obtained from these individuals at multiple  
109 time points following completion of the primary vaccine series or the booster vaccine dose.  
110 PBMCs also were obtained from a separate cohort of 11 COVID-19-naïve healthy donors  
111 following completion of the primary vaccination series (n=11 BNT162b2) (**Table S1**). We then  
112 used flow cytometry to assess the immune cell response in PBMCs following SARS-CoV-2  
113 vaccination (**Fig. 1b, S1a, Table S2**). PAD patients had a reduced percentage of B and T cells  
114 relative to healthy donors (**Fig. S1b, c, Table S2**). However, there was no difference in the  
115 percentage of B cells that were IgD<sup>lo</sup> or IgD<sup>lo</sup>CD27<sup>+</sup> or in the ratio of CD4<sup>+</sup> to CD8<sup>+</sup> cells among

116 the T cell population (**Fig. S1b, c, Table S2**). 29 out of 30 PAD patients had an absolute  
117 lymphocyte count within the normal range on their most recent complete blood count (**Table S3**).

118  
119 We then used His-tagged spike and RBD-binding probes to identify SARS-CoV-2-specific B cells  
120 (34, 35). We found that 25 of 29 (86%) PAD patients with available samples had a detectable  
121 spike and receptor binding domain (RBD)-specific IgD<sup>lo</sup> B cell response following vaccination (**Fig.**  
122 **1c, S2a**). Unexpectedly, we found that most COVID-19-naïve PAD patients displayed a  
123 comparable SARS-CoV-2-specific B cell response to COVID-19-healthy donors at all time points  
124 (**Fig. 1c, S2a**). The four PAD patients that did not respond to vaccination had a reduced  
125 percentage of B cells that were IgD<sup>lo</sup> and IgD<sup>lo</sup> CD27<sup>+</sup> and had a reduced neutralizing antibody  
126 titer against the WA1/2020 and B.1.617.2 viruses following vaccination compared to responding  
127 PAD patients (**Fig. S1b, d, Table S2**). COVID-19-experienced individuals with PAD syndrome  
128 displayed a greater SARS-CoV-2 specific B cell response at day 7 to 28 following vaccination  
129 relative to both healthy donor and COVID-19 naïve PAD patients, before declining to a  
130 comparable level to the other 2 groups by day 60 (**Fig. 1c, S2a**). The SARS-CoV-2-specific  
131 response amongst the activated B cell (IgD<sup>lo</sup> CD20<sup>+</sup> CD38<sup>int-lo</sup>) population was divided between  
132 conventional (CD27<sup>+</sup>) and double negative (CD27<sup>-</sup>) memory B cells, with both populations  
133 displaying similar kinetics in COVID-19-naïve PAD patients and healthy donors (**Fig. 1d, e, S2b,**  
134 **c**). Double negative B cells accumulate in individuals with chronic infection or autoimmunity, but  
135 also are induced following vaccination in healthy individuals (36, 37). There was also a small  
136 population of SARS-CoV-2-specific B cells detected amongst the non-class-switched memory  
137 (IgD<sup>+</sup> CD27<sup>+</sup>) B cell population following vaccination, with this population declining to baseline  
138 levels by day 150 in all groups (**Fig. 1f, S2d**). Together, these data indicate that most individuals  
139 with PAD syndromes can induce a comparable B cell response following SARS-CoV-2  
140 vaccination to healthy donors, and that prior exposure to COVID-19 leads to a greater response  
141 upon vaccination in PAD patients.

142  
143 **COVID-19-naïve individuals with PAD syndrome have a robust B cell response following**  
144 **booster vaccination.** We next evaluated the B cell response following booster vaccination in  
145 individuals with PAD syndromes. Most COVID-19-naïve individuals with PAD syndromes  
146 mounted a SARS-CoV-2-specific B cell response at day 7-28 following booster vaccination, with  
147 an elevated percentage of cells present at day 150 following boosting compared to pre-boost  
148 levels (**Fig. 2a, S3a**). However, there was minimal increase in the SARS-CoV-2-specific B cell  
149 response in COVID-experienced PAD patients following boosting (**Fig. 2a-d, S3a-d**). The SARS-

150 CoV-2-specific B cell response following boosting was largely composed of conventional memory  
151 and double negative B cells (**Fig. 2b-d, S3b-d**). While the percentage of SARS-CoV-2-specific  
152 memory B cells prior to booster vaccination did not correlate with the titer of neutralizing antibodies  
153 against the WA1/2020 and B.1.617.2 viruses, there was a correlation between the RBD-specific  
154 memory B cell response and the neutralizing antibody titer against B.1.1.529 (**Fig. 2e-g**). This  
155 suggests that SARS-CoV-2-specific memory B cells present in PAD individuals prior to booster  
156 vaccination can give rise to antibody-secreting cells capable of neutralizing viral variants.

157  
158 **Defect in IgG1 class-switching in memory B cells from COVID-19-naïve individuals with**  
159 **PAD syndrome rescued following booster vaccination.** We next evaluated the isotype  
160 specificity of the conventional memory B cell response following SARS-CoV-2 vaccination in 25  
161 PAD patients that responded to vaccination (**Fig. 3a**). COVID-19-naïve individuals with PAD  
162 syndromes had a reduced percentage of IgG1<sup>+</sup> memory B cells relative to healthy donors at day  
163 7 to 28 post vaccination, with these individuals also displaying an elevated percentage of IgM<sup>+</sup>  
164 SARS-CoV-2-specific memory B cells (**Fig. 3b, c, S4a, b**). However, booster vaccination led to  
165 an increase in the percentage of IgG1<sup>+</sup> memory B cells in COVID-19-naïve PAD patients to levels  
166 comparable to the healthy donors post vaccination (**Fig. 3b, S4a**). Booster vaccination also led to  
167 a concomitant decrease in the percentage of IgM<sup>+</sup> memory B cells (**Fig. 3c, S4b**). There was no  
168 significant difference in the percentage of IgA<sup>+</sup>, IgG2<sup>+</sup> or IgG3<sup>+</sup> memory B cells between healthy  
169 donors and COVID-19-naïve individuals (**Fig. 3d-f, S4c-e**). COVID-19-experienced individuals  
170 with PAD syndromes displayed a similar memory B cell isotype composition to the healthy donor  
171 cohort following the primary vaccination series (**Fig. 3, S4**). Together, these data indicate that the  
172 repeated exposure to SARS-CoV-2 through vaccination and/or infection can rescue the defect in  
173 IgG1-class switching seen in some individuals with PAD syndrome.

174  
175 **Memory B cells from individuals with PAD syndrome display impaired CD11c expression**  
176 **following vaccination.** We next assessed the phenotype of the SARS-CoV-2 specific  
177 conventional memory B cell response post vaccination (**Fig. 4a, b**). We observed a marked  
178 increase in the expression of CD11c on SARS-CoV-2-specific memory B cells at day 7 to 28  
179 following vaccination in all groups, (**Fig. 4c, S5a**). CD11c expression is induced on B cells  
180 following antigen encounter and therefore distinguishes recently activated cells. (38). There was  
181 also an increase in the percentage of CD11c<sup>+</sup> cells following boosting in the COVID-19-naïve PAD  
182 syndrome group (**Fig. 4c, S5a**). However, even following an mRNA booster dose, CD11c  
183 expression in COVID-19-naïve and experienced PAD patients was reduced relative to healthy

184 donors at day 7 to 28 post vaccination, suggesting that there is impaired B cell activation in some  
185 individuals with PAD syndromes (39) (**Fig. 4c, S5a**). There was a significant correlation between  
186 the percentage of CD11c<sup>+</sup> and IgG1<sup>+</sup> Spike<sup>+</sup> memory B cells at day 7 to 28 post vaccination in  
187 COVID-19-naïve PAD patients (**Fig. 4d, S5b**). CD11c expression can be induced on B cells by B  
188 cell receptor (BCR) signaling (38). This suggests that the defect in IgG1 class switching seen in  
189 some PAD patients may be related to impaired BCR signaling. However, there was no correlation  
190 between the percentage of CD11c<sup>+</sup> and IgG1<sup>+</sup> CD27<sup>+</sup> Spike<sup>+</sup> memory B cells following boosting  
191 indicating that repeated antigen exposure can rescue the defect in IgG1 class-switching despite  
192 the reduction in B cell activation in many PAD patients (**Fig. 4d, S5b**). The percentage of CD11c<sup>+</sup>  
193 memory B cells decreased by day 90 post vaccination or boosting, with this decrease  
194 accompanied by a concomitant increase in the percentage of CXCR5<sup>+</sup> memory B cells in all groups  
195 (**Fig. 4c, e, S5a, b**).

196  
197 We also determined the phenotype of the SARS-CoV-2 specific double negative B cell response  
198 following vaccination (40). Double negative B cells can be divided into subsets based on  
199 expression of CD11c and CXCR5 (40). There was an increased percentage of CD11c<sup>+</sup> CXCR5<sup>-</sup>  
200 (DN2) cells at day 7 to 28 post vaccination in all groups, with a higher increase in COVID-19  
201 experienced PAD patients compared to COVID-19 naïve patients (**Fig. 4f, S5d**). A similar  
202 increase was observed in both groups of individuals with PAD syndromes following boosting (**Fig.**  
203 **4f, S5d**). Conversely, there was a decrease in the percentage of CD11c<sup>-</sup> CXCR5<sup>+</sup> (DN1) cells at  
204 day 7 to 28 post vaccination in all groups, with this population returning to baseline at day 60 post  
205 vaccination (**Fig. 4g, S5e**). A similar decrease in the percentage of DN1 cells also was apparent  
206 following boosting in the PAD syndromes cohort (**Fig. 4f, S5d**). There was no clear difference in  
207 the phenotype of the SARS-CoV-2-specific double negative memory B cells between the COVID-  
208 19-naïve PAD individuals and the healthy donor group (**Fig. 4f, g, S5d, e**).

209  
210  
211 **Individuals with PAD syndrome display a robust SARS-CoV-2-specific CD4<sup>+</sup> T cell**  
212 **response following vaccination.** We next evaluated the T cell response following SARS-CoV-  
213 2 vaccination (**Fig. 5a**). SARS-CoV-2-specific CD4<sup>+</sup> T cells were identified using a S<sub>167-180</sub>  
214 tetramer, which binds an immunodominant SARS-CoV-2 spike epitope restricted by the HLA-  
215 DPB1\*04:01 allele that is found at >40% frequency in many populations around the world (41).  
216 We also developed a S<sub>816-830</sub> tetramer that is specific for an immunodominant region of the S-II  
217 portion of spike protein (42, 43). This region is highly conserved among coronaviruses and is also

218 restricted to the HLA-DPB1\*4:01 allele (42). 16 out of 30 individuals with PAD syndromes and 4  
219 out of 11 healthy donor samples had detectable SARS-CoV-2-specific CD4<sup>+</sup> T cell responses.  
220 COVID-naïve PAD patients displayed a similar percentage of SARS-CoV-2-specific CD4<sup>+</sup> T cell  
221 response as healthy donors at day 7 to 28 post vaccination before contracting by day 150 (**Fig.**  
222 **5b-d**). Boosting led to an increase in the SARS-CoV-2-specific CD4<sup>+</sup> T cell response (**Fig. 5b-d**).  
223 COVID-experienced PAD patients had an increased percentage of SARS-CoV-2-specific CD4<sup>+</sup> T  
224 cell prior to vaccination relative to the other groups, consistent with a pre-existing memory  
225 response (**Fig. 5b-d**). There was no correlation between the magnitude of the SARS-COV-2  
226 specific CD4<sup>+</sup> T cell response and the conventional memory B cell response following vaccination  
227 in PAD patients (**Fig. 5e**). However, there was a strong correlation following boosting suggesting  
228 that the pre-existing memory response in PAD patients can give rise to an enhanced B and T cell  
229 response following antigen re-encounter (**Fig. 5f**).

230  
231 **SARS-CoV-2-specific CD4<sup>+</sup> T cells from PAD patients display a similar phenotype to cells**  
232 **from healthy donors.** The phenotype of the SARS-CoV-2-specific CD4<sup>+</sup> T cell response was  
233 next assessed (**Fig. 6a, b**). SARS-CoV-2-specific CD4<sup>+</sup> T cells adopted an activated phenotype  
234 following vaccination and boosting in PAD patients, with this response characterized by increased  
235 cell surface expression of PD1, ICOS, and CD38 (**Fig. 6c-e**). Expression of these markers was  
236 similar between COVID-19-naïve individuals with PAD syndromes and healthy donors at day 7 to  
237 28 following vaccination suggesting that there is no defect in CD4<sup>+</sup> T cell activation in most  
238 individuals with PAD syndromes (**Fig. 6c-e**). We also did not detect a difference in HLA-DR  
239 expression between any of the groups (**Fig. 6f**). The phenotype of the CD4<sup>+</sup> T cell response was  
240 further assessed by determining the percentage of SARS-CoV-2-specific central  
241 (CD45RO<sup>+</sup>CD27<sup>+</sup>CCR7<sup>+</sup>) and effector (CD45RO<sup>+</sup>CD27<sup>+</sup>CCR7<sup>+</sup>) memory CD4<sup>+</sup> T cells (**Fig. 6g,**  
242 **h**). We found there was no difference in the composition of the memory T cell response at T4  
243 between the groups, suggesting that there also not a defect in the development of memory CD4<sup>+</sup>  
244 T cells in PAD patients (**Fig. 6g, h**). Together, these data indicate that patients with PAD  
245 syndromes exhibit a SARS-CoV-2-specific CD4<sup>+</sup> T cell response that is similar in magnitude and  
246 quality to the T cell response in healthy donors following vaccination.

247  
248 **Booster vaccination induces Omicron-specific memory B cells in individuals with PAD**  
249 **syndrome.** We assessed the Omicron-specific B cell response in individuals with PAD  
250 syndromes using a His-tagged protein specific for the spike protein of B.1.1.529 (BA.1) (**Fig. 7a**).  
251 We found that administration of a booster vaccine led to an increase in the percentage of Omicron



252 specific memory B cells in COVID-19-naïve individuals (**Fig. 7b**). This increase was evident in  
253 both the conventional and double negative B cell populations (**Fig. 7c, d**). There was no increase  
254 in the percentage of Omicron-specific non-class switched B cells (**Fig. 7e**). The percentage of  
255 Omicron-specific B cell returned to pre-boost baseline level in most COVID-19-naïve individuals  
256 by day 90 post boost (**Fig. 7b-d**). However, patient 110 displayed a robust increase in their  
257 percentage of Omicron-specific B cell between B2 and B3, along with an increase in their SARS-  
258 CoV-2-specific T cell response and neutralizing antibody titers. The B2 and B3 time points  
259 correspond to the period between November 2021 and January 2022, when COVID-19 cases in  
260 the United States surged due to the emergence of the Omicron variant. Patient 102 was confirmed  
261 to have been re-infected between B2 and B3 and also displayed increased SARS-CoV-2-specific  
262 T cell, B cell, and neutralizing antibody responses. Of note, patient 102 and 110 reported no or  
263 very mild symptoms during this period.

264

## 265 **DISCUSSION**

266

267 In this study, we demonstrated that SARS-CoV-2 vaccination can induce a long-lived memory B  
268 and CD4<sup>+</sup> T cell response in individuals with PAD syndromes that is comparable to the response  
269 seen in healthy donors. Furthermore, we found that the SARS-CoV-2-specific memory B cell  
270 response correlated with neutralizing antibody titers against the Omicron variant following  
271 boosting. Only 4 out of 29 patients did not develop a spike-specific memory B cell response  
272 following vaccination with these individuals also having lower levels of memory B cells and  
273 activated B cells compared to the other patients in the cohort. These results suggest that memory  
274 B and T cells can promote long-term protective immunity in individuals with PAD syndromes  
275 despite their impaired ability to mount optimal and sustained antibody responses following  
276 infection and vaccination.

277

278 Despite the normal total memory B cell response in PAD patients in our cohort, SARS-CoV-2-  
279 specific memory B cells from COVID-19-naïve PAD patients displayed reduced IgG1 class-  
280 switching following the primary vaccination series. These cells also displayed impaired CD11c  
281 expression, with a positive correlation seen between the percentage of spike-specific CD11c<sup>+</sup> and  
282 IgG1<sup>+</sup> cells following vaccination. CD11c expression is regulated by BCR stimulation, with CD11c<sup>+</sup>  
283 B cells displaying increased expression of genes involved in B cell activation and antigen  
284 presentation (38). This suggests that the defect in IgG1 class-switching in some PAD patients  
285 may be due to impaired BCR signaling and/or reduced T cell help. IgG1 class switching is rescued

286 in PAD patients following booster vaccination. mRNA booster vaccination also led to an increase  
287 in Omicron-specific B cells. Together, these data indicate that administration of mRNA booster  
288 vaccination doses may have durable benefits in addition to the short-term increase in total SARS-  
289 CoV-2-specific B cells and antibody titers. Many PAD patients in this cohort who historically had  
290 poor immune responses to bacterial and other protein antigens (e.g., *Streptococcus*  
291 *pneumoniae* polysaccharides, tetanus toxoid, and diphtheria toxin) as part of their initial immune  
292 workup responded to mRNA vaccines (**Table S4**). The basis of this difference remains unclear,  
293 although it could be due to the unique adjuvant properties of the lipid nanoparticles or in vitro-  
294 synthesized mRNA (44).

295  
296 Our data also suggest that administration of additional booster vaccines may not lead to an  
297 additional short-term increase in SARS-CoV-2-specific B cells. COVID-19 experienced individuals  
298 with PAD syndrome had a robust response to the primary vaccination series but displayed no  
299 further increase in SARS-CoV-2-specific B cells after administration of a booster vaccine. These  
300 individuals also did not display any further increase in their percentage of IgG1<sup>+</sup> memory B cells  
301 or in the antibody avidity (24). This finding is consistent with other studies showing that COVID-  
302 19-experienced healthy donors do not display a further increase in their SARS-CoV-2-specific  
303 memory B cell response following boosting (45). This does not indicate that additional booster  
304 vaccines may not promote additional evolution of the memory B cell repertoire in individuals with  
305 PAD syndromes that is independent of cell number (46).

306  
307 While the B cell response after completion of the primary vaccination series was assessed in  
308 other work, these studies did not detect a SARS-CoV-2-specific memory B cell response above  
309 baseline and concluded that vaccination of individuals with PAD syndromes primarily results in a  
310 double negative memory B cell response (47, 48). We find that SARS-CoV-2 vaccination induces  
311 both a conventional and double negative memory B cell response in most PAD patients that is  
312 comparable to healthy donors, and that this response is maintained for at least 150 days after  
313 completion of the primary vaccination series. The disparity in results between these studies may  
314 be due to a difference in sensitivity in the probes used, as the previous study detected very few  
315 cells that bound to spike probes even in healthy donors. Heterogeneity existing within individuals  
316 classified as having PAD syndromes may also contribute to difference seen between these  
317 studies.

318  
319 T cells also have an important role in mediating protective immunity against SARS-CoV-2 (44).

320 Assessment of the SARS-CoV-2-specific T cell response typically involves stimulation of PBMCs  
321 with peptides spanning the SARS-CoV-2 spike protein and assaying for activation induced  
322 markers (AIM) or intracellular cytokines. Previous studies reported a reduced percentage of  
323 interferon gamma-producing T cells following *ex vivo* stimulation in some vaccinated individuals  
324 with PAD syndromes (15, 23, 48). We stained PBMCs with tetramers against both S<sub>167-180</sub> and  
325 S<sub>816-830</sub> tetramers, which bind to immunodominant peptides restricted by the HLA-DPB1\*04:01  
326 allele. This allowed us to directly detect SARS-CoV-2 specific CD4<sup>+</sup> T cells without requiring  
327 additional stimulation. The SARS-CoV-2-specific CD4<sup>+</sup> T cell response was comparable in  
328 magnitude and phenotype to between COVID-naïve PAD patients and healthy donors that  
329 generated a detectable response. Booster vaccination led to a marked increase in the SARS-  
330 CoV-2-specific CD4<sup>+</sup> T cell response. These results suggest that the SARS-CoV-2-specific CD4<sup>+</sup>  
331 T cells may contribute to the immune response upon re-infection. However, they do not exclude  
332 the possibility that SARS-CoV-2-specific CD4<sup>+</sup> T cells in some individuals with PAD syndromes  
333 may exhibit impaired cytokine production. Further work is needed to assess the magnitude and  
334 phenotype of the SARS-CoV-2-specific CD8<sup>+</sup> T cell response in PAD patients.

335  
336 Individuals that are moderately to severely immunocompromised have an elevated risk of severe  
337 COVID-19 illness and death and are recommended to receive a third dose of mRNA-based  
338 vaccine as part of their primary series. This recommendation is supported by findings from our  
339 group and others that immunocompromised individuals have a reduced SARS-CoV-2-specific  
340 antibody titer following the initial two-dose vaccination series relative to healthy controls (15, 23,  
341 24, 47, 48). Booster vaccination increased the SARS-CoV-2 specific antibody titer and led to the  
342 development of Omicron-specific neutralizing antibodies (24). However, the increase in  
343 neutralizing antibodies titers displayed following booster vaccination was short-lived and returned  
344 to the pre-boost baseline within 90 days (24). Our finding show that a booster dose increases the  
345 level and enriches the repertoire of spike-specific memory B cells in PAD patients and might have  
346 a long-term benefit beyond the short-lived increase in anti-spike and anti-RBD antibody titers.

347  
348 Most individuals with PAD syndromes receive immunoglobulin replacement therapy.  
349 Immunoglobulin replacement products administered between May 2021- January 2022 had low  
350 levels of SARS-CoV-2-specific antibody titers with low neutralization activity against ancestral  
351 strains (24). While the titer of anti-spike and anti-RBD in immunoglobulin replacement products  
352 increased over time, the long lag of 9-12 months between collection and production of IVIG and  
353 SCIG commercial products may make most available commercial immunoglobulin replacement

354 products less effective against current circulating Omicron variants (33). Although many  
355 individuals with PAD might be eligible for long-acting combination monoclonal antibody  
356 prophylaxis (e.g., Evusheld [AZD7442]) against COVID-19, recent studies showed substantial  
357 (~176-fold) losses in potency against some lineages of Omicron virus (e.g., BA.1.1) (49).  
358 Therefore, immunization of individuals with PAD syndromes with mRNA vaccines that include a  
359 booster may be the most effective way to induce a protective immune response against SARS-  
360 CoV-2 and its variants.

361 **Limitations to the study.** One limitation is that not all patients elected to receive a booster  
362 vaccination resulting in lower number of samples in the post-booster time points. This lack of  
363 samples is particularly apparent in the COVID-experienced group, which included only three  
364 individuals that received a booster vaccination, limiting the conclusions that can be drawn from  
365 this data. Another limitation is that the design of this study precluded the collection of a pre-  
366 vaccination blood draw from all individuals. Finally, it is important to note that PAD syndromes are  
367 a heterogeneous group of diseases with our cohort including individuals with CVID,  
368 hypogammaglobulinemia, and specific antibody deficiency. While we did not observe a clear  
369 difference in the immune response between these subgroups, there could be heterogeneity  
370 between different PAD subgroups that necessitate different vaccination and boosting approaches.

371

## 372 **MATERIALS AND METHODS**

373 **Primary antibody deficiency syndromes cohort.** The study was approved by the Institutional  
374 Review Board of Washington University School of Medicine (Approval # 202104138). Patients  
375 were identified by a medical record search for PAD syndromes, and their records were reviewed  
376 to confirm their diagnosis and verify they met the inclusion criteria. COVID-19 vaccination status  
377 was reviewed, and subjects were contacted if they were within the vaccination window or not yet  
378 immunized. Inclusion criteria included males and females over 18 years of age, health care  
379 provider-documented PAD syndromes including common variable immunodeficiency (CVID),  
380 specific-antibody deficiency, or hypogammaglobulinemia, and the ability to give informed  
381 consent. Entry criteria also included receipt of a SARS-CoV-2 vaccine within 14 days of  
382 enrollment, receipt of the second dose of mRNA vaccine (Moderna mRNA-1273 or Pfizer  
383 BioNTech BNT162b2) within 28 days of the first visit, or receipt of one dose of adenoviral-vector  
384 vaccine (J&J Ad26.COVS) within 35 days of initial visit. Exclusion criteria included  
385 participation in an investigational study of SARS-CoV-2 vaccines within the past year, history of  
386 HIV infection, an active cancer diagnosis, treatment with immunosuppressive medications,

387 history of hematologic malignancy, history of anti-CD20 monoclonal antibody therapy, receipt of  
388 live-attenuated vaccine within 30 days or any inactivated vaccine within 14 days of SARS-CoV-2  
389 vaccination, blood or blood product donation within 30 days prior to study vaccination, and  
390 planned blood donation at any time during or 30 days after the duration of subject study  
391 participation.

392  
393 In total, 469 charts were reviewed, and 160 subjects were contacted. A total of 30 adults (27  
394 females, 3 males) with PAD syndromes met eligibility requirements and agreed to enroll in the  
395 study (see Table S1); we note a sex-bias in the enrollees from our PAD cohort, which is not  
396 typical for the disease itself. Ages ranged from 20 to 82, with an average age of 48.4 years old.  
397 Twenty PAD patients had CVID, six had specific antibody deficiency, and four had  
398 hypogammaglobulinemia. Twenty-seven of these subjects had received immunoglobulin  
399 replacement therapy before and during the study period from nine different products. Nineteen  
400 subjects received the BNT162b2, eight received mRNA-1273, and three received Ad26.COV2.S  
401 vaccines. Of the 30 subjects, nine were diagnosed with a prior SARS-CoV-2 infection with a  
402 positive nasal swab RT-PCR test, and one received treatment with an anti-SARS-CoV-2  
403 monoclonal antibody (bamlanivimab) 90 days prior to study enrollment (**Table S1**).

404  
405 All subjects had one mandatory post-vaccine blood sample collection with optional pre-vaccine  
406 and follow-up visits at days 60, 90, and 150 ( $\pm 14$  days) after vaccination. The optional pre-  
407 vaccination blood sample was collected up to 14 days before receiving vaccine. For subjects  
408 who received a two-dose series of mRNA vaccines, the first post-vaccination blood collection  
409 occurred 7 to 28 days after the second dose. For subjects receiving the Ad26.COV2.S single-  
410 dose vaccine, the first post-vaccination blood sample was collected 21 to 35 days after  
411 immunization. Since the study was non-interventional, patients were informed if they mounted  
412 an immune response to the vaccine, but the decision to receive a booster was made between  
413 the patient and their physician. Subjects who opted for boosting provided a blood sample up to  
414 14 days prior to receiving the booster dose, unless the subject previously provided a sample  
415 within 2 weeks as part of the optional post-vaccine assessments. Subjects returned for an  
416 additional sample 7 to 28 days after receiving the booster (range 7-27 days, median 17 days,  
417 mean 17 days. One patient had her post-booster sample drawn at day 35), with a second and  
418 third post-booster visit and sample collection occurring at  $90 \pm 14$  days and  $150 \pm 14$  days.

419

420 **Healthy donor cohort.** Immunocompetent healthy donor volunteer blood samples were  
421 obtained as previously described (50). The healthy donor study was approved by the  
422 Institutional Review Board of Washington University School of Medicine (Approval #  
423 202012081).

424  
425 **Quantification and statistical analysis.** Statistical significance was determined using Prism  
426 Version 9 (GraphPad). Statistical analysis was determined by one-way ANOVA, unpaired t-test,  
427 mixed model analysis, or two-way ANOVA with Fisher's least significant difference testing.  
428 Associations were calculated using Pearson rank correlation and are shown with Pearson trend  
429 lines for visualization.

430  
431 **ACKNOWLEDGEMENTS:**  
432 This study was supported by grants and contracts from NIH: DP2AI169978 and K22AI153015 [all  
433 to B.J.L.], R01 AI157155, U01 AI151810, and 75N93019C00051 [all to M.S.D.], U01AI141990,  
434 U01AI150747, HHSN272201400006C, HHSN272201400008C, and 75N93019C00051 [all to  
435 A.H.E.], and R01 DK084242 [to P.L.K.]. The study also was supported by a VA Merit Award  
436 BX002882 [to P.L.K.]. This study utilized samples obtained from the Washington University School  
437 of Medicine COVID-19 biorepository, which is supported by the NIH/National Center for  
438 Advancing Translational Sciences (UL1 TR002345). The WU368 studies were reviewed and  
439 approved by the Washington University Institutional Review Board (approval no. 308 202012081).  
440 The authors thank Likui Yang and the Bursky Center for Human Immunology Tetramer Core for  
441 their help generating tetramer reagents. The authors also express their gratitude to all study  
442 participants.

443  
444 **AUTHOR CONTRIBUTIONS:**  
445 F.J.L. performed experiments, analyzed the data, and prepared the manuscript.  
446 A.L.T.D. enrolled subjects, collected demographic and clinical data, processed PBMC samples,  
447 performed experiments, and analyzed data.  
448 H.G.D.A., F.R.Z. and E.R. processed PBMC samples.  
449 L.J.A. and D.H.F. generated crucial reagents.  
450 C.H.H. performed experiments and analyzed the data.  
451 C.L., L.A.V, and R.E.C designed and performed antibody neutralization experiments and  
452 analyzed data.

453 J.M.M and C.J.R collected demographic and clinical data, enrolled patients, and provided patient  
454 care.

455 H.J.W., And.K, T.B.D, Ant.K. and Z.R. provided patient care.

456 T.L.M. wrote the study protocol, managed IRB compliance, enrolled patients, and processed  
457 patient samples.

458 C.C.O collected patient demographic and clinical data, enrolled patients, and processed samples.

459 S.R. planned experiments and analyzed data.

460 A.H.E and J.T contributed samples from the healthy donor cohort.

461 J.A.O and R.M.P wrote and maintained the Institutional Review Board protocol, recruited, and  
462 phlebotomized participants and coordinated sample collection of healthy donors.

463 P.L.K. supervised the project.

464 P.A.M. generated crucial reagents.

465 M.S.D planned experiments and analyzed data.

466 O.Z. designed the study, wrote the study protocol, processed PBMC samples, performed  
467 experiments, analyzed the data, and supervised the project.

468 B.J.L. planned the experiments, analyzed the data, prepared the manuscript, and supervised the  
469 project.

470

#### 471 **COMPETING INTERESTS:**

472 M.S.D. is a consultant for Inbios, Vir Biotechnology, Senda Biosciences, and Carnival  
473 Corporation, and is on the Scientific Advisory Boards of Moderna and Immunome. The Diamond  
474 laboratory has received unrelated funding support in sponsored research agreements from  
475 Moderna, Vir Biotechnology, Immunome, and Emergent BioSolutions.

476 O.Z. and family own Moderna stock. The Ellebedy laboratory received unrelated funding support  
477 from Emergent BioSolutions and AbbVie.

478 A.H.E. is a consultant for Mubadala Investment Company and the founder of ImmuneBio  
479 Consulting. J.S.T. is a consultant for Gerson Lehrman Group.

480 J.S.T. and A.H.E. are recipients of a licensing agreement with Abbvie that is unrelated to this  
481 manuscript.

482

#### 483 **DATA AVAILABILITY:**

484 All data reported in this paper will be shared upon request. Any additional information required to  
485 reanalyze the data reported in this paper is available from the corresponding authors upon  
486 request.

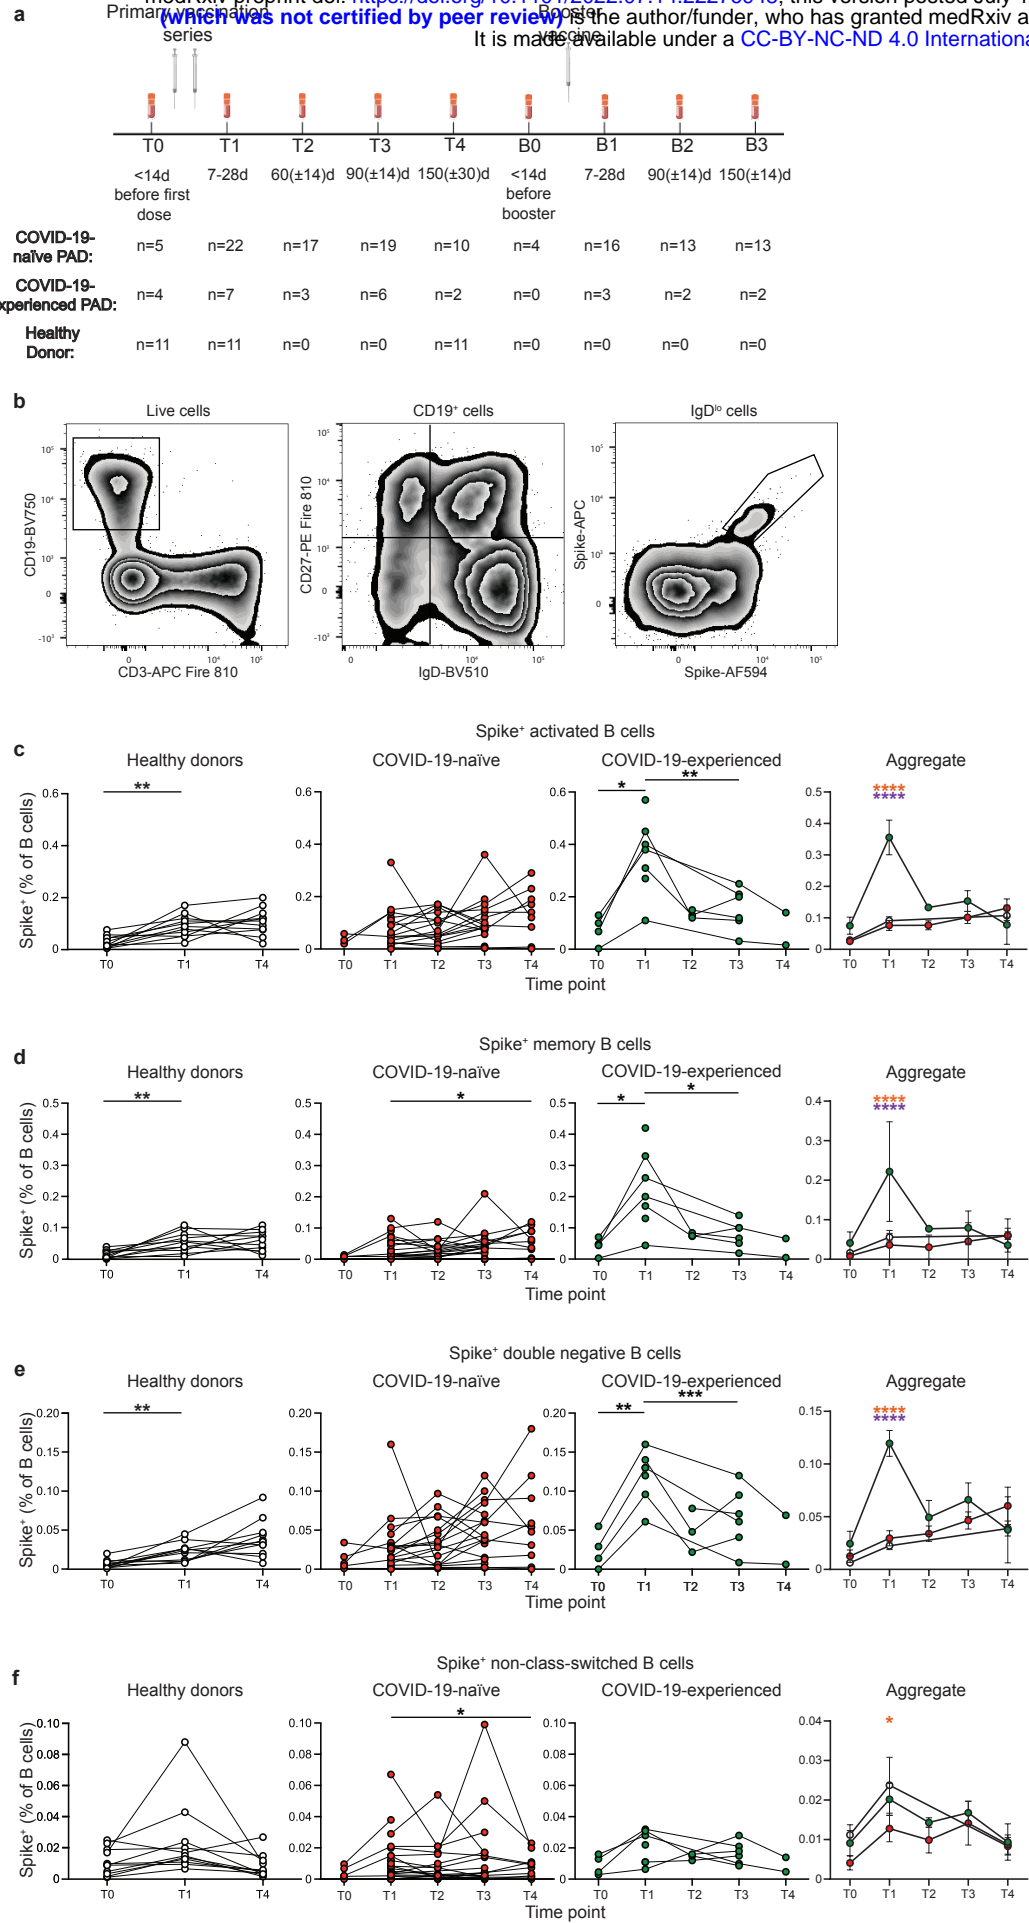

**Figure 1**



487 **Figure 1. COVID-19-experienced PAD patients display elevated spike-specific B cell**  
488 **response following primary vaccination series.** (a) Schematic of study design including time  
489 points in which PBMCs were obtained and number of samples per time point for each group. (b)  
490 Representative FACS plots of the gating strategy used to identify activated (IgD<sup>lo</sup>) Spike<sup>+</sup> B  
491 cells. (c) Percentage of activated Spike<sup>+</sup> cells amongst the B (Live CD19<sup>+</sup> CD3<sup>-</sup>) cell population  
492 in the healthy donor (left, white), COVID-19-naïve PAD (middle left, red), and COVID-19-  
493 experienced PAD (middle right, green) cohorts. Aggregate of mean percentage of B cells that  
494 are Spike<sup>+</sup> activated cells in all groups is shown on right. (d) Percentage of memory (IgD<sup>lo</sup>  
495 CD20<sup>+</sup> CD38<sup>int-lo</sup> CD27<sup>+</sup>) Spike<sup>+</sup> cells amongst the B cell population in the healthy donor (left,  
496 white), COVID-19-naïve PAD (middle, red), and COVID-19-experienced PAD (middle, green)  
497 cohorts. Aggregate of mean percentage of B cells that are Spike<sup>+</sup> memory cells in all groups is  
498 shown on right. (e) Percentage of double negative (IgD<sup>lo</sup> CD20<sup>+</sup> CD38<sup>int-lo</sup> CD27<sup>-</sup>) Spike<sup>+</sup> cells  
499 amongst the B cell population in the healthy donor (left, white), COVID-19-naïve PAD (middle,  
500 red), and COVID-19-experienced PAD (middle, green) cohorts. Aggregate of mean percentage  
501 of B cells that are double negative Spike<sup>+</sup> cells in all groups is shown on right. (f) Percentage of  
502 non-class-switched (IgD<sup>+</sup> CD20<sup>+</sup> CD38<sup>int-lo</sup> CD27<sup>+</sup>) Spike<sup>+</sup> cells amongst the B cell population in  
503 the healthy donor (left, white), COVID-19-naïve PAD (middle, red), and COVID-19-experienced  
504 PAD (middle, green) cohorts. Aggregate of mean percentage of B cells that are Spike<sup>+</sup> non-  
505 class-switched cells in all groups is shown on right. Statistical analyses in c-f were performed  
506 using a mixed-effects model (for trends found between time points) or two-way ANOVA (for  
507 trends found between groups in the aggregate graphs) with Fisher's least significant difference  
508 testing. Significance testing between time points was limited to comparisons relative to T1. On  
509 the aggregate graphs, error bars were displayed based on the standard error of the mean.  
510 Above the aggregate graphs, an orange asterisk indicates a comparison between the COVID-  
511 19-naïve and COVID-19-experienced groups, and a purple asterisk indicates a comparison  
512 between the COVID-19-experienced and healthy donor groups (\*,  $p < 0.05$ ; \*\*,  $p < 0.01$ ; \*\*\*,  
513  $p < 0.001$ ; \*\*\*\*,  $p < 0.001$ ). See also Figure S2.

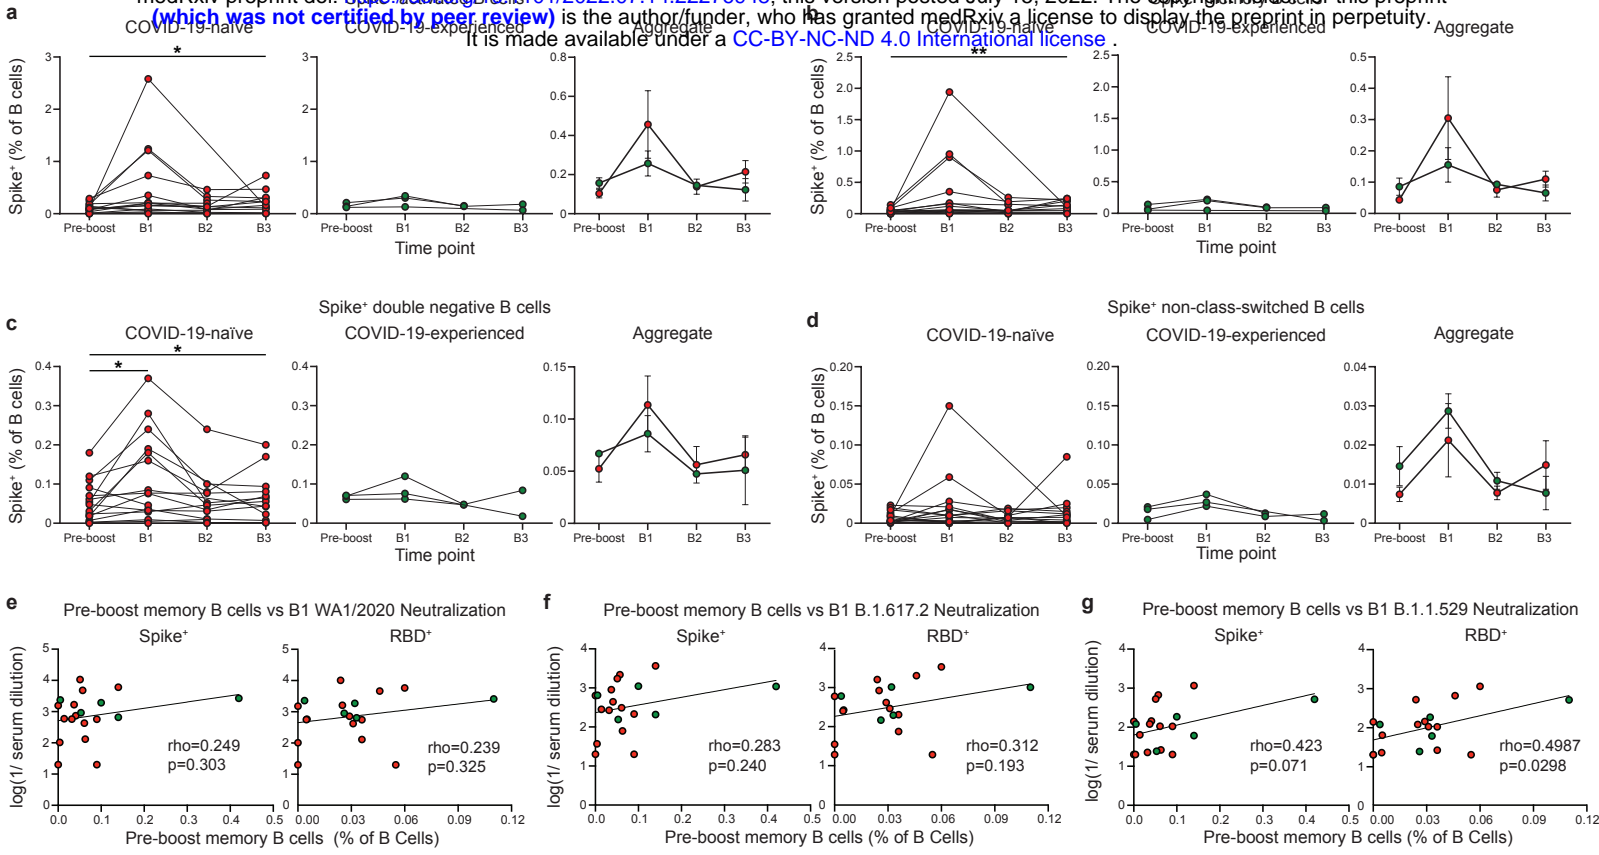

**Figure 2**

514 **Figure 2. COVID-19-naïve PAD patients display elevated spike-specific B cell response**  
515 **following booster vaccination. (a)** Percentage of activated Spike<sup>+</sup> cells amongst the B (Live  
516 CD19<sup>+</sup> CD3<sup>+</sup>) cell population in the healthy donor (left, white), COVID-19-naïve PAD (middle left,  
517 red), and COVID-19-experienced PAD (middle right, green) cohorts. Aggregate of mean  
518 percentage of B cells that are Spike<sup>+</sup> activated cells in all groups is shown on right. **(b)**  
519 Percentage of memory (IgD<sup>lo</sup> CD20<sup>+</sup> CD38<sup>int-lo</sup> CD27<sup>+</sup>) Spike<sup>+</sup> cells amongst the B cell population  
520 in the healthy donor (left, white), COVID-19-naïve PAD (middle, red), and COVID-19-  
521 experienced PAD (middle, green) cohorts. Aggregate of mean percentage of B cells that are  
522 Spike<sup>+</sup> memory cells in all groups is shown on right. **(c)** Percentage of double negative (IgD<sup>lo</sup>  
523 CD20<sup>+</sup> CD38<sup>int-lo</sup> CD27<sup>-</sup>) Spike<sup>+</sup> cells amongst the B cell population in the healthy donor (left,  
524 white), COVID-19-naïve PAD (middle, red), and COVID-19-experienced PAD (middle, green)  
525 cohorts. Aggregate of mean percentage of B cells that are double negative Spike<sup>+</sup> cells in all  
526 groups is shown on right. **(d)** Percentage of non-class-switched (IgD<sup>+</sup> CD20<sup>+</sup> CD38<sup>int-lo</sup> CD27<sup>+</sup>)  
527 Spike<sup>+</sup> cells amongst the B cell population in the healthy donor (left, white), COVID-19-naïve  
528 PAD (middle, red), and COVID-19-experienced PAD (middle, green) cohorts. Aggregate of  
529 mean percentage of B cells that are Spike<sup>+</sup> non-class-switched cells in all groups is shown on  
530 right. **(e)** Correlation between percentage of B cells that are Spike<sup>+</sup> (left) or RBD<sup>+</sup> (right) memory  
531 cells prior to administration of booster vaccination and the serum neutralizing activity against  
532 WA1/2020 at B1. **(f)** Correlation between percentage of B cells that are Spike<sup>+</sup> (left) or RBD<sup>+</sup>  
533 (right) memory cells prior to administration of booster vaccination and the serum neutralizing  
534 activity against B.1.617.2 at B1. **(g)** Correlation between percentage of B cells that are Spike<sup>+</sup>  
535 (left) or RBD<sup>+</sup> (right) memory cells prior to administration of booster vaccination and the serum  
536 neutralizing activity against B.1.1.529 at B1. The pre-boost group consists of the last sample  
537 obtained from each patient prior to booster vaccination. Statistical analyses were performed  
538 using a mixed effects model (for trends found between time points) with Fisher's least significant  
539 difference testing in a-d, or a Pearson rank correlation (with Pearson trend lines for  
540 visualization) in e-g. (\*,  $p < 0.05$ ; \*\*,  $p < 0.01$ ). Significance testing between time points was  
541 limited to comparisons relative to pre-boost. On the aggregate graphs, error bars were  
542 calculated based on the standard error of the mean. See also Figure S3.

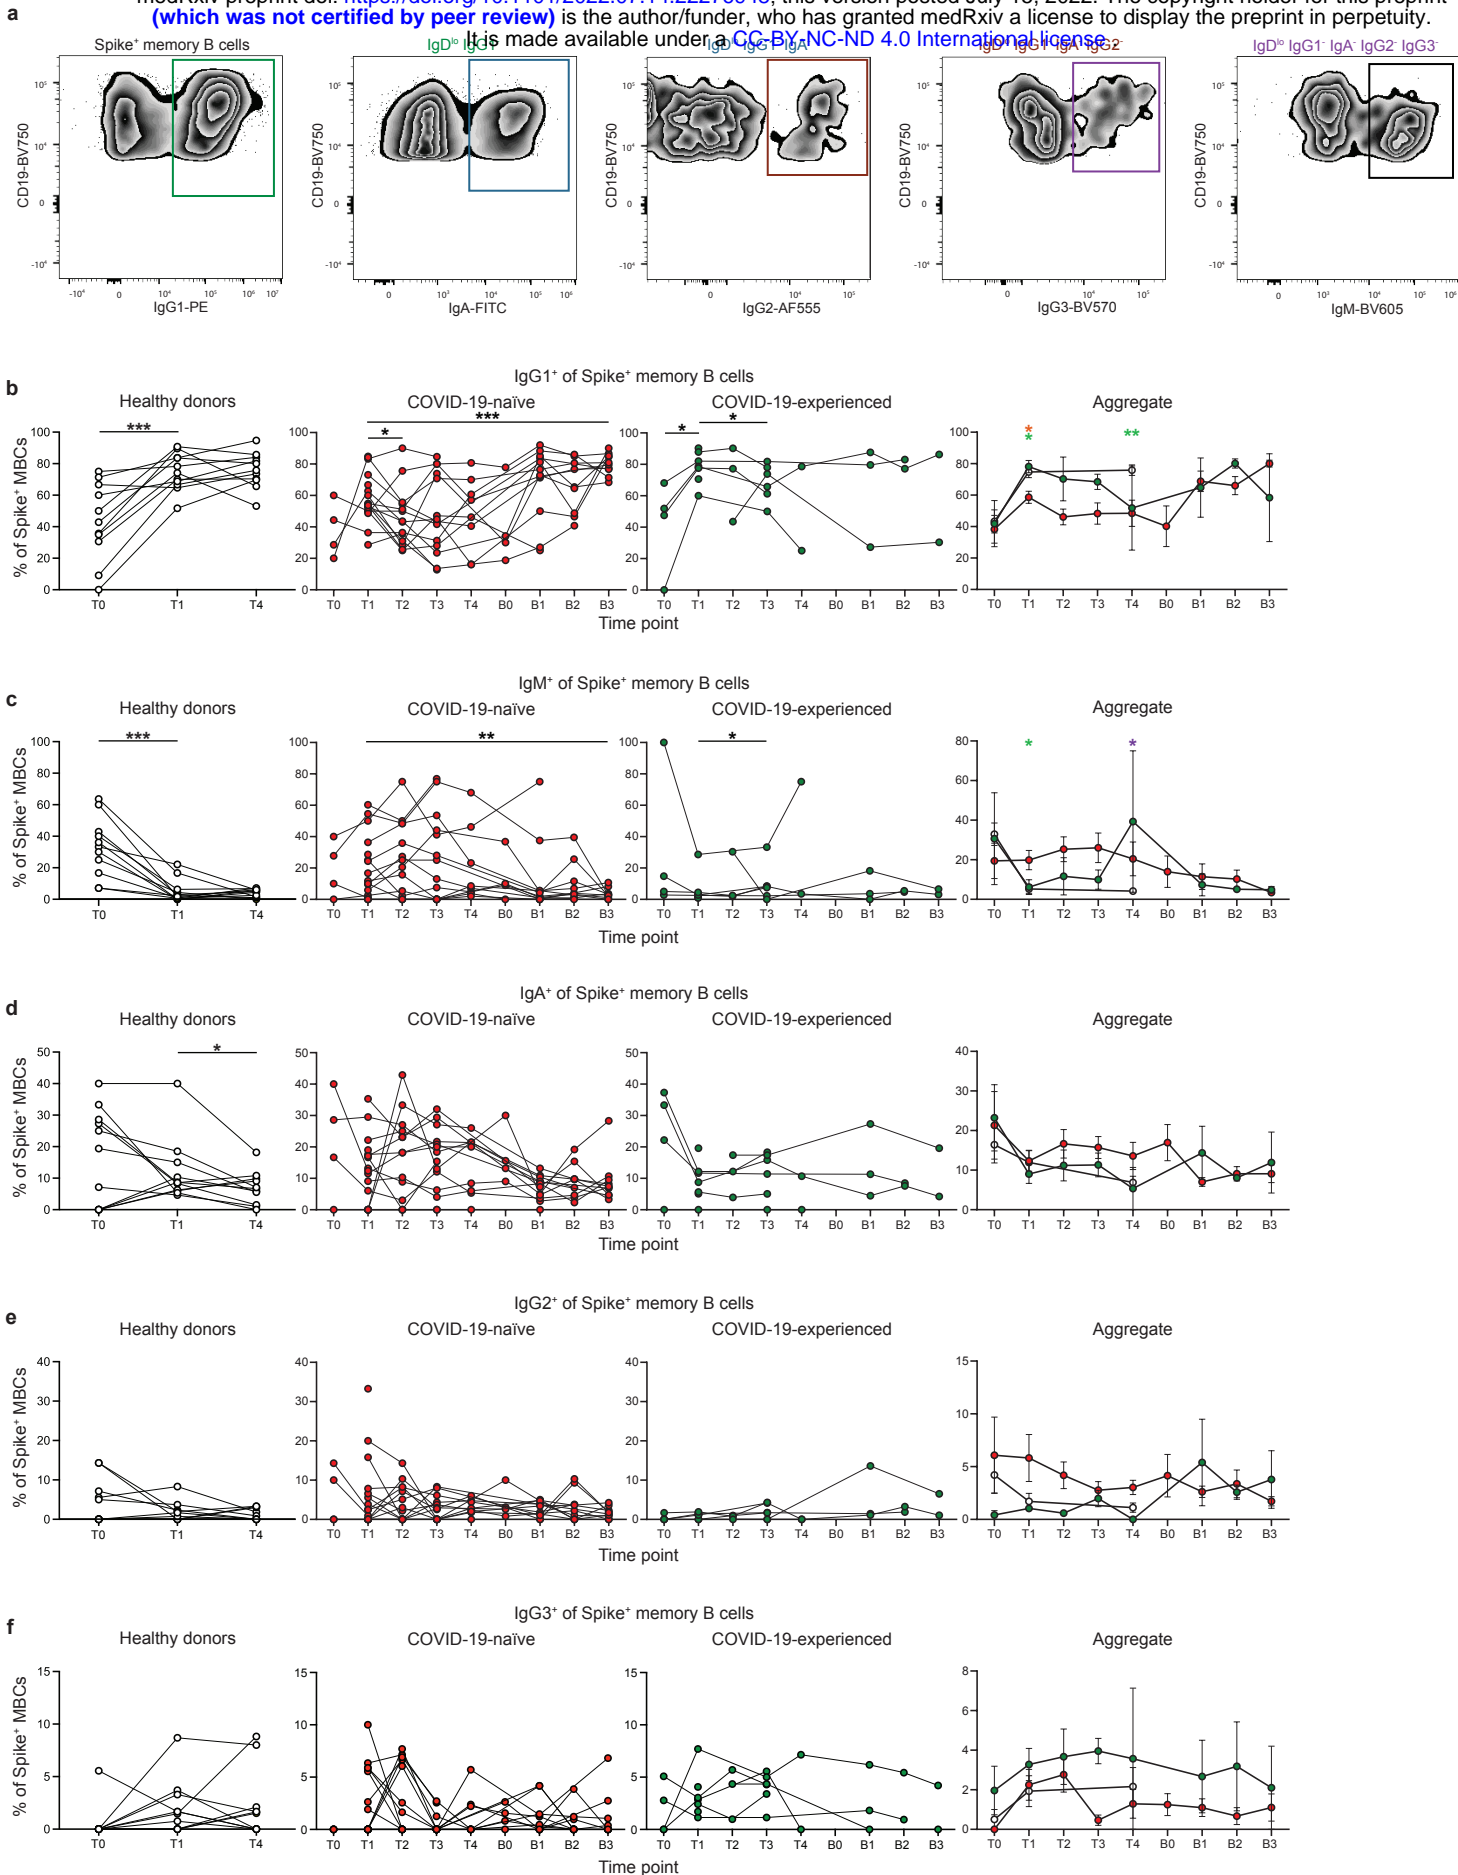

**Figure 3**

543 **Figure 3. Spike-specific memory B cells from COVID-19-naïve PAD patients display**  
544 **reduced IgG1 class switching following primary vaccination series.** (a) Representative  
545 FACS plots of the gating strategy used to identify the isotype of Spike<sup>+</sup> memory (IgD<sup>lo</sup> CD20<sup>+</sup>  
546 CD38<sup>int-lo</sup> CD27<sup>+</sup>) B cells. (b) Percentage of Spike<sup>+</sup> memory B cells that are IgG1<sup>+</sup> in the healthy  
547 donor (left, white), COVID-19-naïve PAD (middle left, red), and COVID-19-experienced PAD  
548 (middle right, green) cohorts. Aggregate of mean percentage of IgG1<sup>+</sup> cells in all groups is  
549 shown on right. (c) Percentage of Spike<sup>+</sup> memory B cells that are IgM<sup>+</sup> in the healthy donor (left,  
550 white), COVID-19-naïve PAD (middle left, red), and COVID-19-experienced PAD (middle right,  
551 green) cohorts. Aggregate of mean percentage of IgM<sup>+</sup> cells in all groups is shown on right. (d)  
552 Percentage of Spike<sup>+</sup> memory B cells that are IgA<sup>+</sup> in the healthy donor (left, white), COVID-19-  
553 naïve PAD (middle left, red), and COVID-19-experienced PAD (middle right, green) cohorts.  
554 Aggregate of mean percentage of IgA<sup>+</sup> cells in all groups is shown on right. (e) Percentage of  
555 Spike<sup>+</sup> memory B cells that are IgG2<sup>+</sup> in the healthy donor (left, white), COVID-19-naïve PAD  
556 (middle left, red), and COVID-19-experienced PAD (middle right, green) cohorts. Aggregate of  
557 mean percentage of IgG2<sup>+</sup> cells in all groups is shown on right. (f) Percentage of Spike<sup>+</sup> memory  
558 B cells that are IgG3<sup>+</sup> in the healthy donor (left, white), COVID-19-naïve PAD (middle left, red),  
559 and COVID-19-experienced PAD (middle right, green) cohorts. Aggregate of mean percentage  
560 of IgG3<sup>+</sup> cells in all groups is shown on right. Statistical analyses in b-d were performed using a  
561 mixed effects model (for trends found between time points) or two-way ANOVA (for trends found  
562 between groups in the aggregate graphs) with Fisher's least significant difference testing.  
563 Significance testing between time points was limited to comparisons relative to T1. On the  
564 aggregate graphs, error bars were calculated based on the standard error of the mean. Above  
565 the aggregate graphs, a green asterisk indicates a comparison between the COVID-19-naïve  
566 and healthy donor groups, an orange asterisk indicates a comparison between the COVID-19-  
567 naïve and COVID-19-experienced groups, and a purple asterisk indicates a comparison  
568 between the COVID-19-experienced and healthy donor groups (\*,  $p < 0.05$ ; \*\*,  $p < 0.01$ ; \*\*\*,  $p <$   
569  $0.001$ ). See also Figure S4.  
570

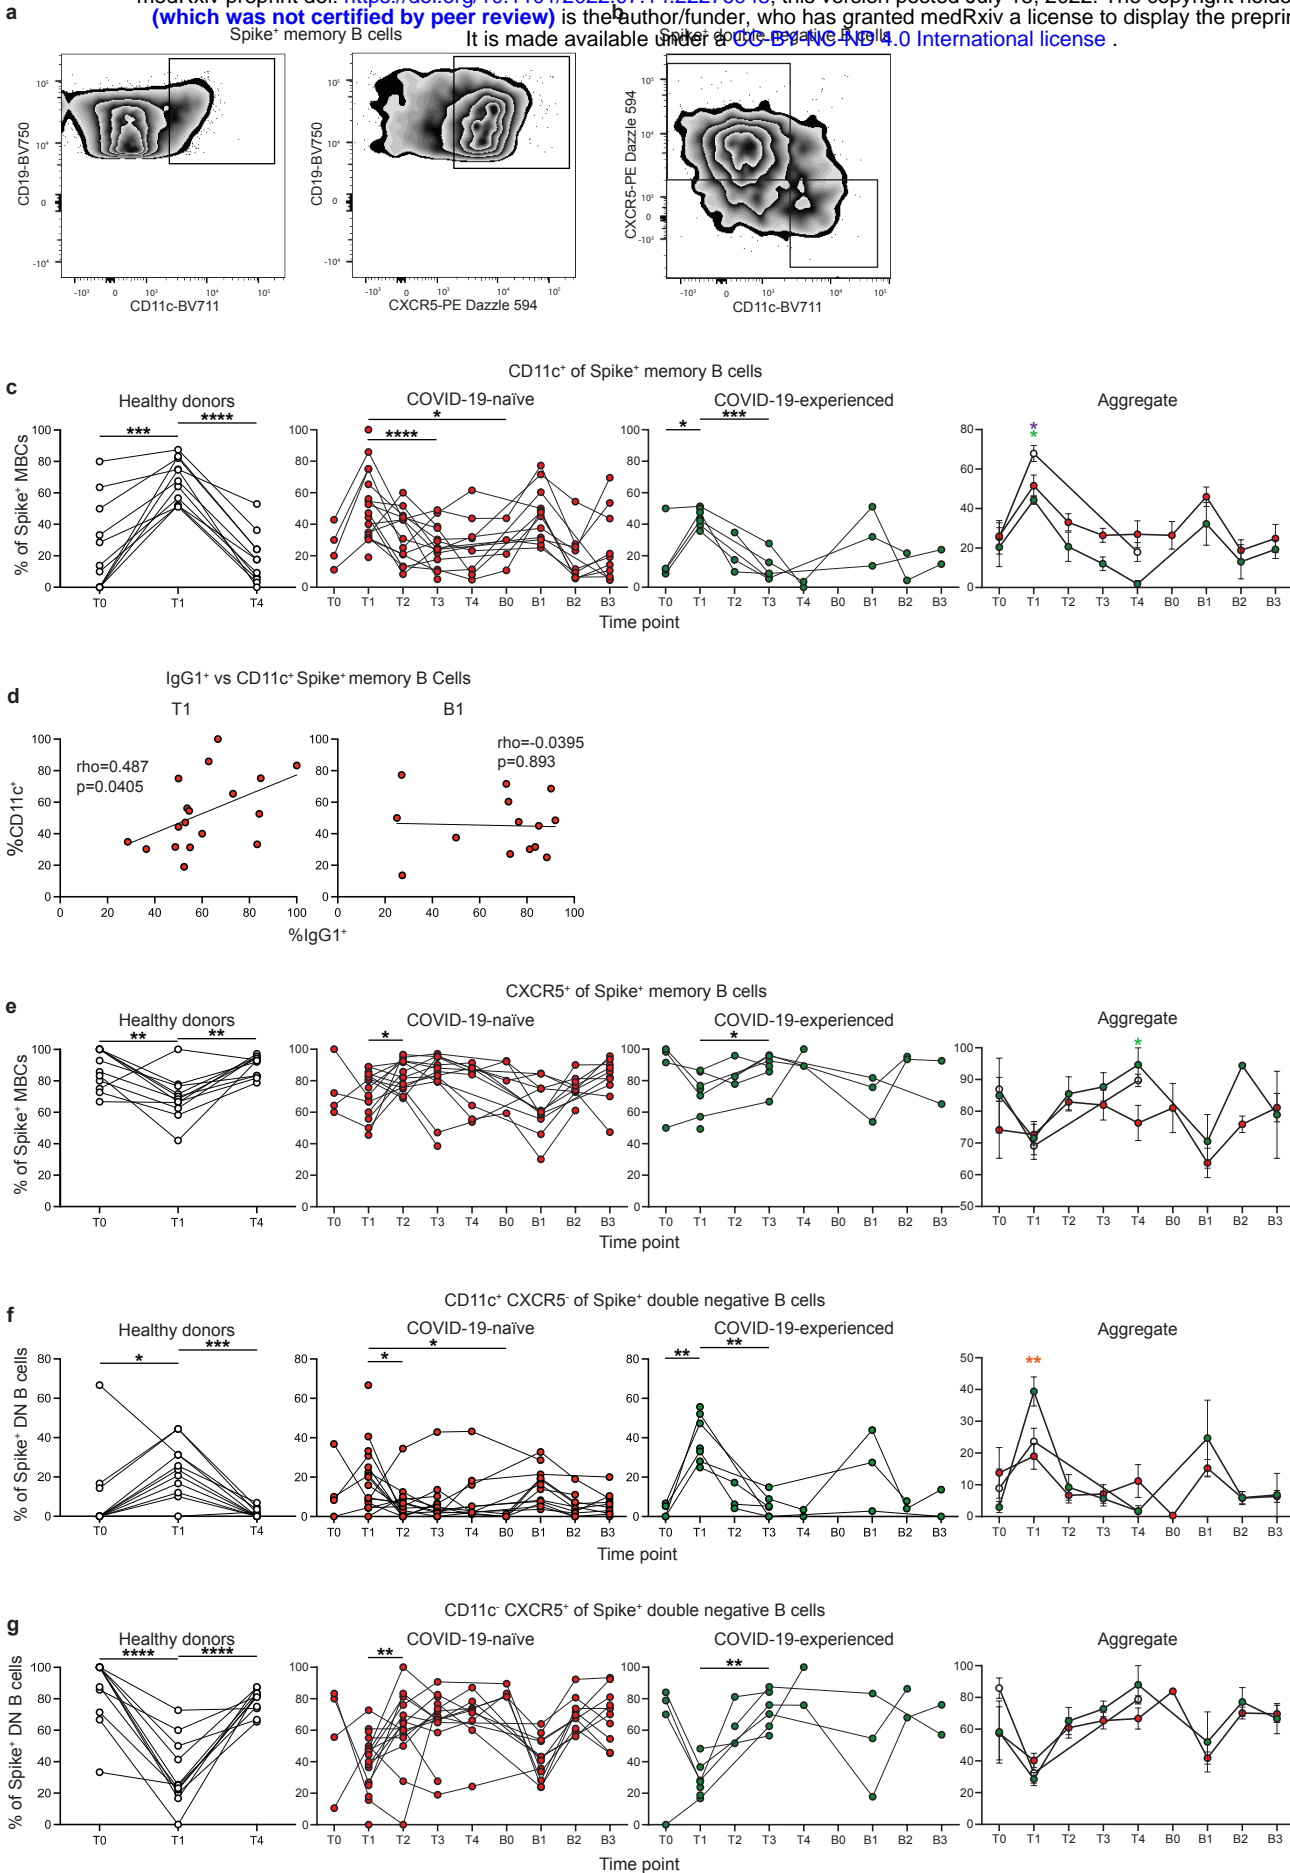

Figure 4

571 **Figure 4. Spike-specific memory B cells from PAD patients display reduced CD11c**  
572 **expression class.** (a) Representative FACS plots of the expression of CD11c and CXCR5 on  
573 Spike<sup>+</sup> memory (IgD<sup>lo</sup> CD20<sup>+</sup> CD38<sup>int-lo</sup> CD27<sup>+</sup>) B cells. (b) Representative FACS plots of the  
574 expression of CD11c and CXCR5 on Spike<sup>+</sup> double negative (IgD<sup>lo</sup> CD20<sup>+</sup> CD38<sup>int-lo</sup> CD27<sup>-</sup>) B  
575 cells. (c) Percentage of Spike<sup>+</sup> memory B cells that are CD11c<sup>+</sup> in the healthy donor (left,  
576 white), COVID-19-naïve PAD (middle left, red), and COVID-19-experienced PAD (middle right,  
577 green) cohorts. Aggregate of mean percentage of CD11c<sup>+</sup> cells in all groups is shown on right.  
578 (d) Correlation between percentage of Spike<sup>+</sup> memory B cells that are IgG1<sup>+</sup> and CD11c<sup>+</sup> at T1  
579 (left) or B1 (right). Associations for d are calculated using Pearson rank correlation and are  
580 shown with Pearson trend lines for visualization. (e) Percentage Spike<sup>+</sup> memory B cells that are  
581 CXCR5<sup>+</sup> in the healthy donor (left, white), COVID-19-naïve PAD (middle left, red), and COVID-  
582 19-experienced PAD (middle right, green) cohorts. Aggregate of mean percentage of CXCR5<sup>+</sup>  
583 cells in all groups is shown on right. (f) Percentage of Spike<sup>+</sup> double negative B cells that are  
584 CD11c<sup>+</sup> CXCR5<sup>-</sup> in the healthy donor (left, white), COVID-19-naïve PAD (middle left, red), and  
585 COVID-19-experienced PAD (middle right, green) cohorts. Aggregate of mean percentage of  
586 are CD11c<sup>+</sup> CXCR5<sup>-</sup> cells in all groups is shown on right. (g) Percentage of Spike<sup>+</sup> double  
587 negative B cells that are CD11c<sup>-</sup> CXCR5<sup>+</sup> in the healthy donor (left, white, COVID-19-naïve PAD  
588 (middle left, red), and COVID-19-experienced PAD (middle right, green) cohorts. Aggregate of  
589 mean percentage of are CD11c<sup>-</sup> CXCR5<sup>+</sup> cells in all groups is shown on right. Statistical  
590 analyses in c, e-g were performed using a mixed effects model (for trends found between time  
591 points) or two-way ANOVA (for trends found between groups in the aggregate graphs) with  
592 Fisher's least significant difference testing. Significance testing between time points was limited  
593 to comparisons relative to T1. On the aggregate graphs, error bars were calculated based on  
594 the standard error of the mean. Above the aggregate graphs, a green asterisk indicates a  
595 comparison between the COVID-19-naïve and healthy donor groups, an orange asterisk  
596 indicates a comparison between the COVID-19-naïve and COVID-19-experienced groups, and  
597 a purple asterisk indicates a comparison between the COVID-19-experienced and healthy donor  
598 groups (\*,  $p < 0.05$ ; \*\*,  $p < 0.01$ ; \*\*\*,  $p < 0.001$ ; \*\*\*\*,  $p < 0.0001$ ). See also Figure S5.

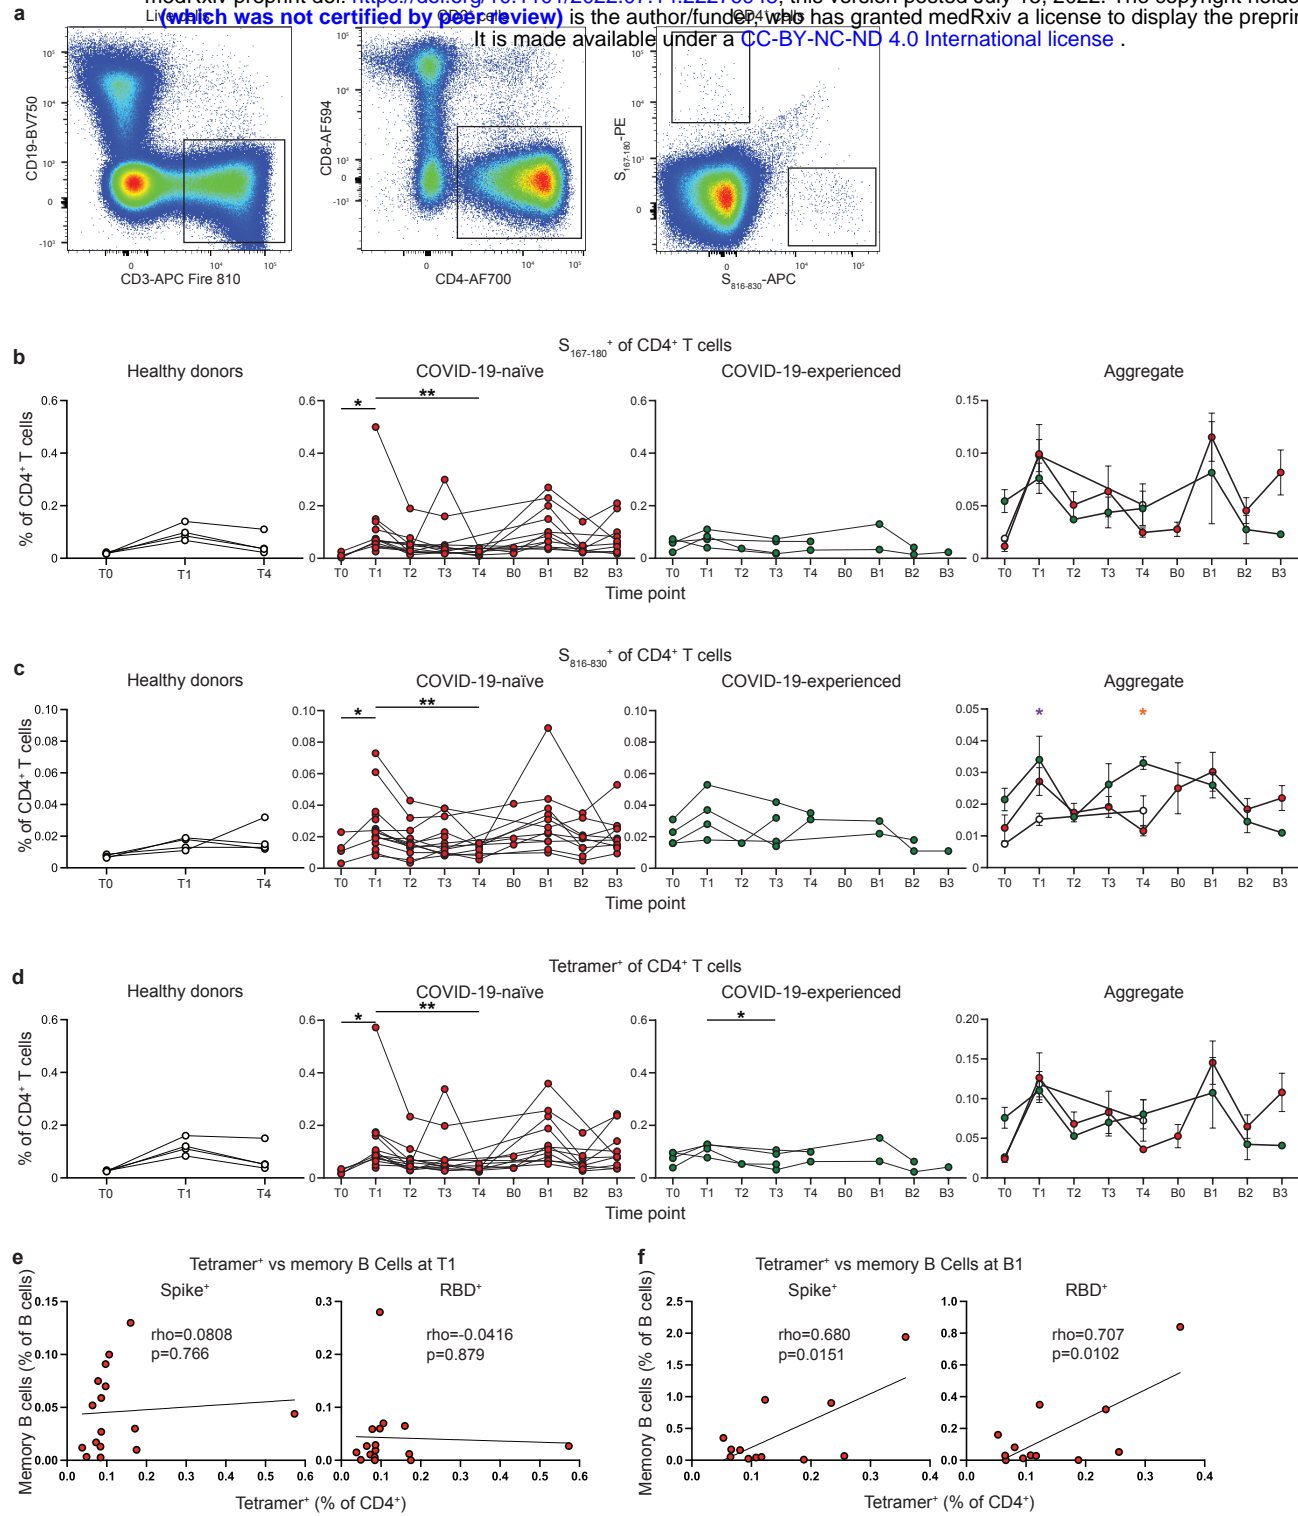

**Figure 5**



599 **Figure 5. PAD patients display unimpaired SARS-CoV-2-specific CD4<sup>+</sup> T cell response**  
600 **following vaccination.** (a) Representative FACS plots of the gating strategy used to identify  
601 S<sub>167-180</sub><sup>+</sup> and S<sub>816-830</sub><sup>+</sup> CD4<sup>+</sup> T cells. (b) Percentage of CD4<sup>+</sup> (Live CD3<sup>+</sup> CD19<sup>-</sup> CD4<sup>+</sup> CD8<sup>-</sup>) T  
602 cells that are S<sub>167-180</sub><sup>+</sup> in the healthy donor (left, white), COVID-19-naïve PAD (middle left, red),  
603 and COVID-19-experienced PAD (middle right, green) cohorts. Aggregate of mean percentage  
604 of S<sub>167-180</sub><sup>+</sup> cells in all groups is shown on right. (c) Percentage of CD4<sup>+</sup> T cells that are S<sub>816-830</sub><sup>+</sup>  
605 in the healthy donor (left, white), COVID-19-naïve PAD (middle left, red), and COVID-19-  
606 experienced PAD (middle right, green) cohorts. Aggregate of mean percentage of S<sub>816-830</sub><sup>+</sup> cells  
607 in all groups is shown on right. (d) Combined percentage of CD4<sup>+</sup> T cells that are tetramer<sup>+</sup>  
608 (S<sub>167-180</sub><sup>+</sup> or S<sub>816-830</sub><sup>+</sup>) in the healthy donor (left, white), COVID-19-naïve PAD (middle left, red),  
609 and COVID-19-experienced PAD (middle right, green) cohorts. Aggregate of mean percentage  
610 of tetramer<sup>+</sup> cells in all groups is shown on right. (e) Correlation between percentage of B cells  
611 that are Spike<sup>+</sup> (left) or RBD<sup>+</sup> (right) memory (IgD<sup>lo</sup> CD20<sup>+</sup> CD38<sup>int-lo</sup> CD27<sup>+</sup>) cells and the  
612 percentage of CD4<sup>+</sup> T cells that are Tetramer<sup>+</sup> at T1. (f) Correlation between percentage of B  
613 cells that are Spike<sup>+</sup> (left) or RBD<sup>+</sup> (right) memory cells and the percentage of CD4<sup>+</sup> T cells that  
614 are Tetramer<sup>+</sup> at B1. Associations for e and f are calculated using Pearson rank correlation and  
615 are shown with Pearson trend lines for visualization. Statistical analyses in b-d were performed  
616 using a mixed effects model (for trends found between time points) or two-way ANOVA (for  
617 trends found between groups in the aggregate graphs) with Fisher's least significant difference  
618 testing. Significance testing between time points was limited to comparisons relative to T1. On  
619 the aggregate graphs, error bars were calculated based on the standard error of the mean.  
620 Above the aggregate graphs, an orange asterisk indicates a comparison between the COVID-  
621 19-naïve and COVID-19-experienced groups, and a purple asterisk indicates a comparison  
622 between the COVID-19-experienced and healthy donor groups (\*,  $p < 0.05$ ; \*\*,  $p < 0.01$ ).

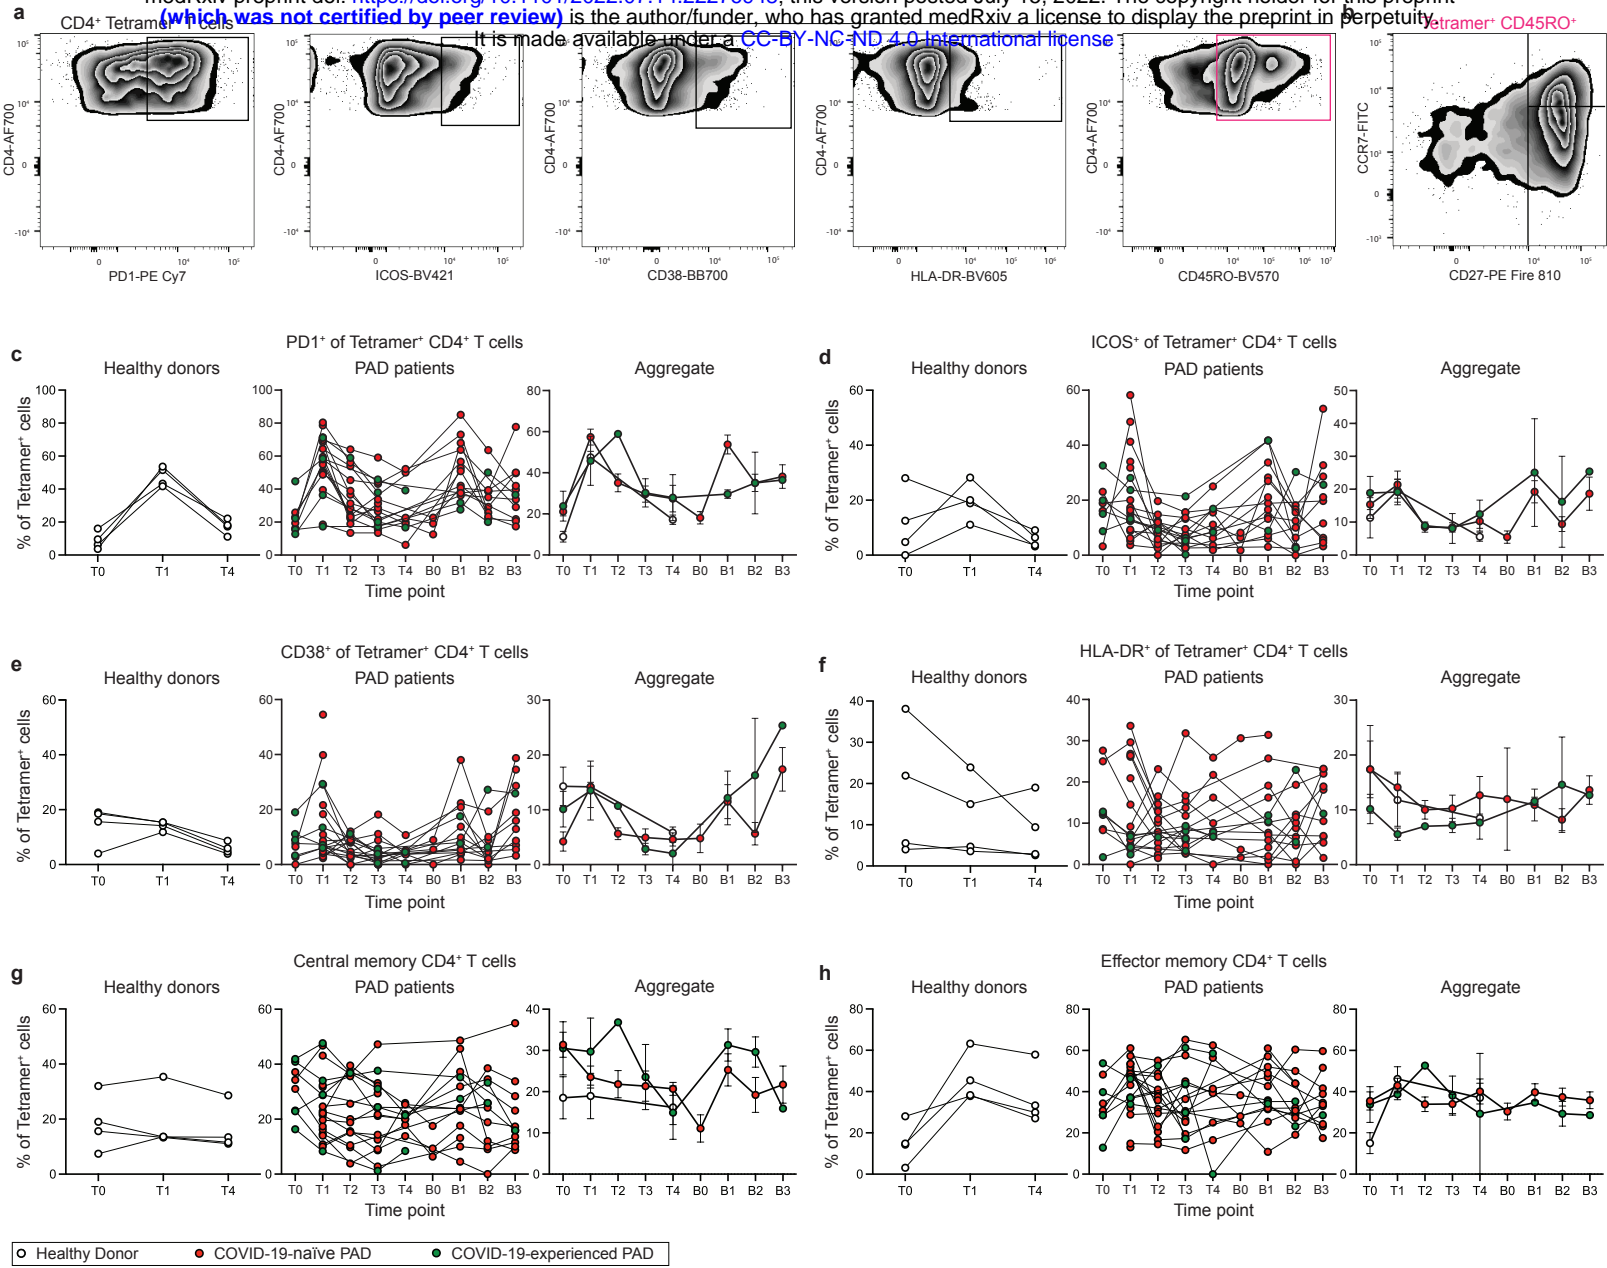

**Figure 6**

623 **Figure 6. Phenotype of SARS-CoV-2-specific CD4<sup>+</sup> T cell response following vaccination**  
624 **in PAD patients.** (a) Representative FACS plots of the expression of PD1, ICOS, CD38, HLA-  
625 DR, and CD45RO on Tetramer<sup>+</sup> CD4<sup>+</sup> (Live CD3<sup>+</sup> CD19<sup>-</sup> CD4<sup>+</sup> CD8<sup>-</sup> S<sub>167-180</sub><sup>+</sup> or S<sub>816-830</sub><sup>+</sup>) T cells.  
626 (b) Representative FACS plots of the expression of CD27 and CCR7 on CD45RO<sup>+</sup> Tetramer<sup>+</sup>  
627 CD4<sup>+</sup> T cells. (c) Percentage of Tetramer<sup>+</sup> CD4<sup>+</sup> T cells that are PD1<sup>+</sup> in the healthy donor (left,  
628 white), COVID-19-naïve PAD (middle, red), and COVID-19-experienced PAD (middle, green)  
629 cohorts. Aggregate of mean percentage of Tetramer<sup>+</sup> T cells that are PD1<sup>+</sup> in all groups is  
630 shown on right. (d) Percentage of Tetramer<sup>+</sup> CD4<sup>+</sup> T cells that are ICOS<sup>+</sup> in the healthy donor  
631 (left, white), COVID-19-naïve PAD (middle, red), and COVID-19-experienced PAD (middle,  
632 green) cohorts. Aggregate of mean percentage of Tetramer<sup>+</sup> T cells that are ICOS<sup>+</sup> in all groups  
633 is shown on right. (e) Percentage of Tetramer<sup>+</sup> CD4<sup>+</sup> T cells that are CD38<sup>+</sup> in the healthy donor  
634 (left, white), COVID-19-naïve PAD (middle, red), and COVID-19-experienced PAD (middle,  
635 green) cohorts. Aggregate of mean percentage of Tetramer<sup>+</sup> T cells that are CD38<sup>+</sup> in all groups  
636 is shown on right. (f) Percentage of Tetramer<sup>+</sup> CD4<sup>+</sup> T cells that are HLA-DR<sup>+</sup> in the healthy  
637 donor (left, white), COVID-19-naïve PAD (middle, red), and COVID-19-experienced PAD  
638 (middle, green) cohorts. Aggregate of mean percentage of Tetramer<sup>+</sup> T cells that are HLA-DR<sup>+</sup>  
639 in all groups is shown on right. (g) Percentage of Tetramer<sup>+</sup> T cells that are central memory  
640 (CD45RO<sup>+</sup> CD27<sup>+</sup> CCR7<sup>+</sup>) cells in the healthy donor (left, white), COVID-19-naïve PAD (middle,  
641 red), and COVID-19-experienced PAD (middle, green) cohorts. Aggregate of mean percentage  
642 of Tetramer<sup>+</sup> T cells that are central memory cells in all groups is shown on right. (h) Percentage  
643 of Tetramer<sup>+</sup> T cells that are effector memory (CD45RO<sup>+</sup> CD27<sup>+</sup> CCR7<sup>-</sup>) cells in the healthy  
644 donor (left, white), COVID-19-naïve PAD (middle, red), and COVID-19-experienced PAD  
645 (middle, green) cohorts. Aggregate of mean percentage of Tetramer<sup>+</sup> T cells that are effector  
646 memory in all groups is shown on right. On the aggregate graphs, error bars were calculated  
647 based on the standard error of the mean.

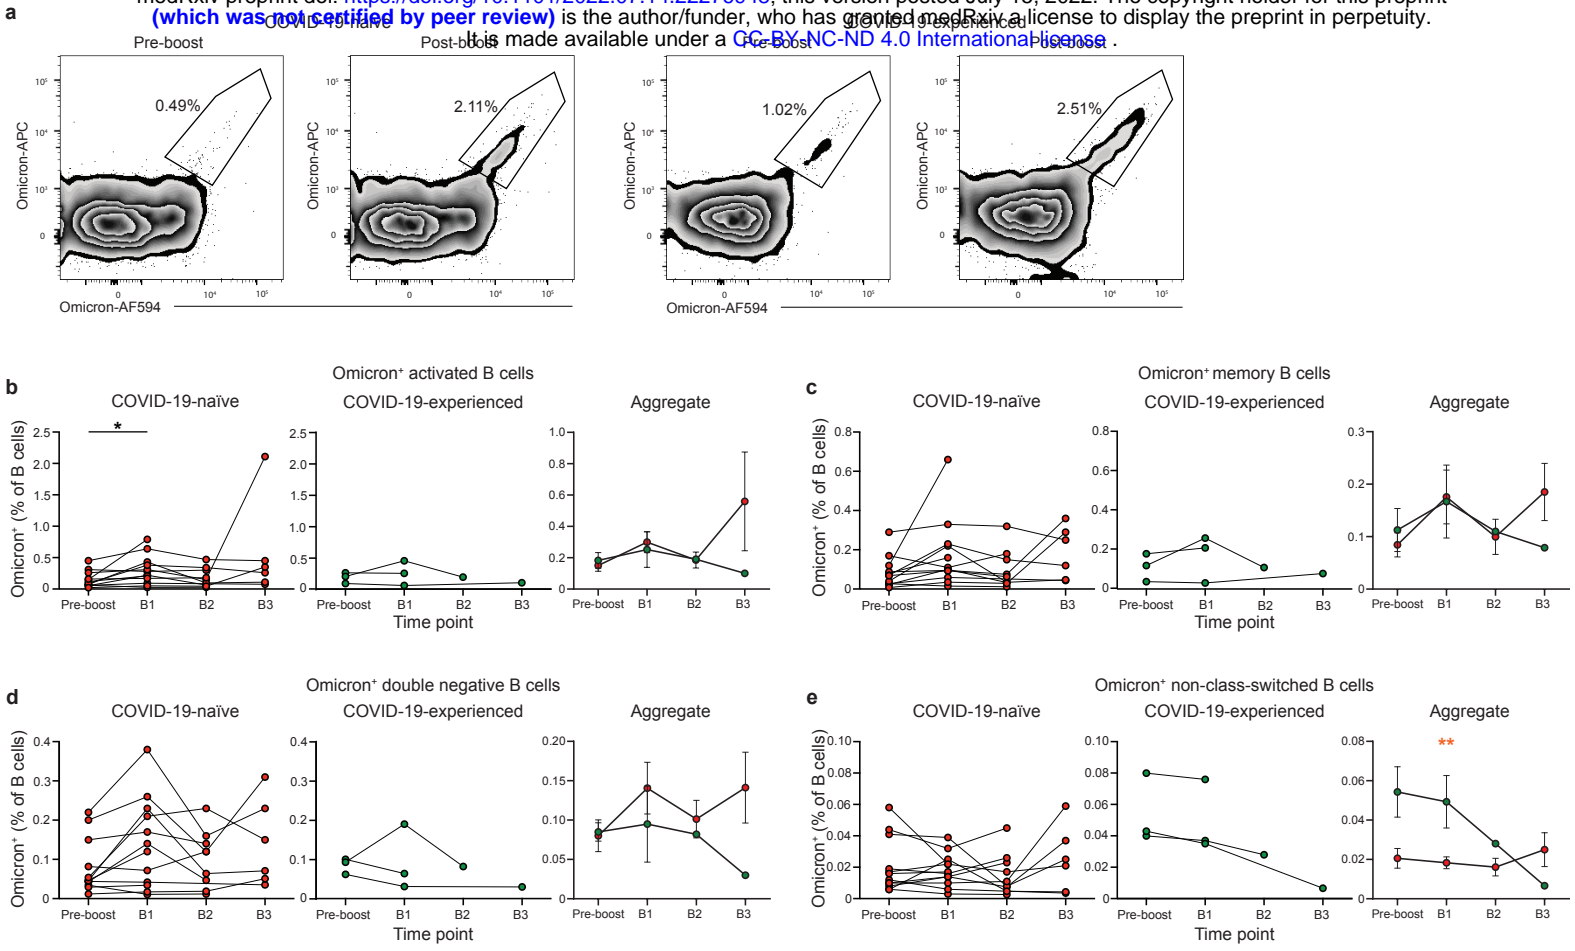

Figure 7

648 **Figure 7. PAD patients display elevated Omicron-specific B cell response following**  
649 **booster vaccination.** (a) Representative FACS plots of the percentage of Omicron-specific B  
650 cells among the memory (IgD<sup>lo</sup> CD20<sup>+</sup> CD38<sup>int-lo</sup> CD27<sup>+</sup>) B cell population prior to and post  
651 booster vaccination in COVID-19-naïve (left) and COVID-19-experienced (right) individuals with  
652 PAD syndromes. (b) Percentage of activated Omicron<sup>+</sup> cells amongst the B (Live CD19<sup>+</sup> CD3<sup>-</sup>)  
653 cell population in the healthy donor (left, white), COVID-19-naïve PAD (middle left, red), and  
654 COVID-19-experienced PAD (middle right, green) cohorts. Aggregate of mean percentage of B  
655 cells that are Omicron<sup>+</sup> activated cells in all groups is shown on right. (c) Percentage of memory  
656 Omicron<sup>+</sup> cells amongst the B cell population in the healthy donor (left, white), COVID-19-naïve  
657 PAD (middle, red), and COVID-19-experienced PAD (middle, green) cohorts. Aggregate of  
658 mean percentage of B cells that are Omicron<sup>+</sup> memory cells in all groups is shown on right. (d)  
659 Percentage of double negative Omicron<sup>+</sup> cells amongst the B cell population in the healthy  
660 donor (left, white), COVID-19-naïve PAD (middle, red), and COVID-19-experienced PAD  
661 (middle, green) cohorts. Aggregate of mean percentage of B cells that are double negative  
662 Omicron<sup>+</sup> cells in all groups is shown on right. (e) Percentage of non-class-switched (IgD<sup>+</sup>  
663 CD20<sup>+</sup> CD38<sup>int-lo</sup> CD27<sup>+</sup>) Omicron<sup>+</sup> cells amongst the B cell population in the healthy donor (left,  
664 white), COVID-19-naïve PAD (middle, red), and COVID-19-experienced PAD (middle, green)  
665 cohorts. Aggregate of mean percentage of B cells that are Omicron<sup>+</sup> non-class-switched cells in  
666 all groups is shown on right. Statistical analyses in b-e were performed using a mixed effects  
667 model (for trends found between time points) or two-way ANOVA (for trends found between  
668 groups in the aggregate graphs) with Fisher's least significant difference testing. Significance  
669 testing between time points was limited to comparisons relative to pre-boost. On the aggregate  
670 graphs, error bars were calculated based on the standard error of the mean. Above the  
671 aggregate graphs, an orange asterisk indicates a comparison between the COVID-19-naïve and  
672 COVID-19-experienced groups (\*,  $p < 0.05$ ; \*\*,  $p < 0.01$ ).

673 **REFERENCES**

674

- 675 1. L. R. Baden, H. M. E. Sahly, B. Essink, K. Kotloff, S. Frey, R. Novak, D. Diemert, S. A.  
676 Spector, N. Rouphael, C. B. Creech, J. McGettigan, S. Khetan, N. Segall, J. Solis, A. Brosz, C.  
677 Fierro, H. Schwartz, K. Neuzil, L. Corey, P. Gilbert, H. Janes, D. Follmann, M. Marovich, J.  
678 Mascola, L. Polakowski, J. Ledgerwood, B. S. Graham, H. Bennett, R. Pajon, C. Knightly, B.  
679 Leav, W. Deng, H. Zhou, S. Han, M. Ivarsson, J. Miller, T. Zaks, C. S. Group, Efficacy and  
680 Safety of the mRNA-1273 SARS-CoV-2 Vaccine. *New Engl J Med*. 384, 403–416 (2020).
- 681 2. F. P. Polack, S. J. Thomas, N. Kitchin, J. Absalon, A. Gurtman, S. Lockhart, J. L. Perez, G. P.  
682 Marc, E. D. Moreira, C. Zerbini, R. Bailey, K. A. Swanson, S. Roychoudhury, K. Koury, P. Li, W.  
683 V. Kalina, D. Cooper, R. W. Frenck, L. L. Hammitt, Ö. Türeci, H. Nell, A. Schaefer, S. Ünal, D.  
684 B. Tresnan, S. Mather, P. R. Dormitzer, U. Şahin, K. U. Jansen, W. C. Gruber, C. C. T. Group,  
685 Safety and Efficacy of the BNT162b2 mRNA Covid-19 Vaccine. *New Engl J Med*. 383, 2603–  
686 2615 (2020).
- 687 3. L. Tang, D. R. Hijano, A. H. Gaur, T. L. Geiger, E. J. Neufeld, J. M. Hoffman, R. T. Hayden,  
688 Asymptomatic and Symptomatic SARS-CoV-2 Infections After BNT162b2 Vaccination in a  
689 Routinely Screened Workforce. *Jama*. 325 (2021), doi:10.1001/jama.2021.6564.
- 690 4. Y. Angel, A. Spitzer, O. Henig, E. Saiag, E. Sprecher, H. Padova, R. Ben-Ami, Association  
691 Between Vaccination With BNT162b2 and Incidence of Symptomatic and Asymptomatic SARS-  
692 CoV-2 Infections Among Health Care Workers. *Jama*. 325 (2021), doi:10.1001/jama.2021.7152.
- 693 5. E. J. Haas, F. J. Angulo, J. M. McLaughlin, E. Anis, S. R. Singer, F. Khan, N. Brooks, M.  
694 Smaja, G. Mircus, K. Pan, J. Southern, D. L. Swerdlow, L. Jodar, Y. Levy, S. Alroy-Preis, Impact  
695 and effectiveness of mRNA BNT162b2 vaccine against SARS-CoV-2 infections and COVID-19  
696 cases, hospitalisations, and deaths following a nationwide vaccination campaign in Israel: an  
697 observational study using national surveillance data. *Lancet*. 397, 1819–1829 (2021).
- 698 6. G. Regev-Yochay, S. Amit, M. Bergwerk, M. Lipsitch, E. Leshem, R. Kahn, Y. Lustig, C.  
699 Cohen, R. Doolman, A. Ziv, I. Novikov, C. Rubin, I. Gimpelevich, A. Huppert, G. Rahav, A. Afek,  
700 Y. Kreiss, Decreased infectivity following BNT162b2 vaccination: A prospective cohort study in  
701 Israel. *Lancet Regional Heal - Europe*. 7, 100150 (2021).
- 702 7. J. Sadoff, G. Gray, A. Vandebosch, V. Cárdenas, G. Shukarev, B. Grinsztejn, P. A. Goepfert,  
703 C. Truyers, H. Fennema, B. Spiessens, K. Offergeld, G. Scheper, K. L. Taylor, M. L. Robb, J.  
704 Treanor, D. H. Barouch, J. Stoddard, M. F. Ryser, M. A. Marovich, K. M. Neuzil, L. Corey, N.  
705 Cauwenberghs, T. Tanner, K. Hardt, J. Ruiz-Guiñazú, M. L. Gars, H. Schuitemaker, J. V. Hoof,  
706 F. Struyf, M. Douoguih, E. S. Group, Safety and Efficacy of Single-Dose Ad26.COVS.2.S Vaccine  
707 against Covid-19. *New Engl J Medicine*. 384, NEJMoa2101544 (2021).
- 708 8. W. Kim, J. Q. Zhou, S. C. Horvath, A. J. Schmitz, A. J. Sturtz, T. Lei, Z. Liu, E. Kalaidina, M.  
709 Thapa, W. B. Alsoussi, A. Haile, M. K. Klebert, T. Suessen, L. Parra-Rodriguez, P. A. Mudd, S.  
710 P. J. Whelan, W. D. Middleton, S. A. Teefey, I. Pusic, J. A. O'Halloran, R. M. Presti, J. S.  
711 Turner, A. H. Ellebedy, Germinal centre-driven maturation of B cell response to mRNA  
712 vaccination. *Nature*. 604, 141–145 (2022).

- 713 9. E. Cameroni, J. E. Bowen, L. E. Rosen, C. Saliba, S. K. Zepeda, K. Culap, D. Pinto, L. A.  
714 VanBlargan, A. D. Marco, J. di Iulio, F. Zatta, H. Kaiser, J. Noack, N. Farhat, N. Czudnochowski,  
715 C. Havenar-Daughton, K. R. Sprouse, J. R. Dillen, A. E. Powell, A. Chen, C. Maher, L. Yin, D.  
716 Sun, L. Soriaga, J. Bassi, C. Silacci-Fregni, C. Gustafsson, N. M. Franko, J. Logue, N. T. Iqbal,  
717 I. Mazzitelli, J. Geffner, R. Grifantini, H. Chu, A. Gori, A. Riva, O. Giannini, A. Ceschi, P. Ferrari,  
718 P. E. Cippà, A. Franzetti-Pellanda, C. Garzoni, P. J. Halfmann, Y. Kawaoka, C. Hebner, L. A.  
719 Purcell, L. Piccoli, M. S. Pizzuto, A. C. Walls, M. S. Diamond, A. Telenti, H. W. Virgin, A.  
720 Lanzavecchia, G. Snell, D. Veessler, D. Corti, Broadly neutralizing antibodies overcome SARS-  
721 CoV-2 Omicron antigenic shift. *Nature*. 602, 664–670 (2022).
- 722 10. K. Wang, Z. Jia, L. Bao, L. Wang, L. Cao, H. Chi, Y. Hu, Q. Li, Y. Zhou, Y. Jiang, Q. Zhu, Y.  
723 Deng, P. Liu, N. Wang, L. Wang, M. Liu, Y. Li, B. Zhu, K. Fan, W. Fu, P. Yang, X. Pei, Z. Cui, L.  
724 Qin, P. Ge, J. Wu, S. Liu, Y. Chen, W. Huang, Q. Wang, C.-F. Qin, Y. Wang, C. Qin, X. Wang,  
725 Memory B cell repertoire from triple vaccinees against diverse SARS-CoV-2 variants. *Nature*.  
726 603, 919–925 (2022).
- 727 11. W. F. Garcia-Beltran, K. J. St. Denis, A. Hoelzemer, E. C. Lam, A. D. Nitido, M. L. Sheehan,  
728 C. Berrios, O. Ofoman, C. C. Chang, B. M. Hauser, J. Feldman, A. L. Roederer, D. J. Gregory,  
729 M. C. Poznansky, A. G. Schmidt, A. J. Iafrate, V. Naranbhai, A. B. Balazs, mRNA-based  
730 COVID-19 vaccine boosters induce neutralizing immunity against SARS-CoV-2 Omicron  
731 variant. *Cell*. 185, 457-466.e4 (2022).
- 732 12. A. Muik, A.-K. Wallisch, B. Sängler, K. A. Swanson, J. Mühl, W. Chen, H. Cai, D. Maurus, R.  
733 Sarkar, Ö. Türeci, P. R. Dormitzer, U. Şahin, Neutralization of SARS-CoV-2 lineage B.1.1.7  
734 pseudovirus by BNT162b2 vaccine-elicited human sera. *Science*. 371, 1152–1153 (2021).
- 735 13. I. Meyts, G. Buccioli, I. Quinti, B. Neven, A. Fischer, E. Seoane, E. Lopez-Granados, C.  
736 Gianelli, A. Robles-Marhuenda, P.-Y. Jeandel, C. Paillard, V. G. Sankaran, Y. Y. Demirdag, V.  
737 Lougaris, A. Aiuti, A. Plebani, C. Milito, V. ASH. Dalm, K. Guevara-Hoyer, S. Sánchez-Ramón,  
738 L. Bezrodnik, F. Barzaghi, L. I. Gonzalez-Granado, G. R. Hayman, G. Uzel, L. O. Mendonça, C.  
739 Agostini, G. Spadaro, R. Badolato, A. Soresina, F. Vermeulen, C. Bosteels, B. N. Lambrecht, M.  
740 Keller, P. J. Mustillo, R. S. Abraham, S. Gupta, A. Ozen, E. Karakoc-Aydiner, S. Baris, A. F.  
741 Freeman, M. Yamazaki-Nakashimada, S. Scheffler-Mendoza, S. Espinosa-Padilla, A. R.  
742 Gennery, S. Jolles, Y. Espinosa, M. C. Poli, C. Fieschi, F. Hauck, C. Cunningham-Rundles, N.  
743 Mahlaoui, I. C. of I. E. of Immunity, K. Warnatz, K. E. Sullivan, S. G. Tangye, Coronavirus  
744 disease 2019 in patients with inborn errors of immunity: An international study. *J Allergy Clin*  
745 *Immunol*. 147, 520–531 (2021).
- 746 14. A. M. Shields, A. Anantharachagan, G. Arumugakani, K. Baker, S. Bahal, H. Baxendale, W.  
747 Bermingham, M. Bhole, E. Boules, P. Bright, C. Chopra, L. Cliffe, B. Cleave, J. Dempster, L.  
748 Devlin, F. Dhalla, L. Diwakar, E. Drewe, C. Duncan, M. Dziadzio, S. Elcombe, S. Elkhalfi, A.  
749 Gennery, H. Ghanta, S. Goddard, S. Grigoriadou, S. Hackett, G. Hayman, R. Herriot, A.  
750 Herwadkar, A. Huissoon, R. Jain, S. Jolles, S. Johnston, S. Khan, J. Laffan, P. Lane, L.  
751 Leeman, D. M. Lowe, S. Mahabir, D. J. M. Lochlainn, E. McDermott, S. Misbah, F. Moghaddas,  
752 H. Morsi, S. Murng, S. Noorani, R. O'Brien, S. Patel, A. Price, T. Rahman, S. Seneviratne, A.  
753 Shrimpton, C. Stroud, M. Thomas, K. Townsend, P. Vaitla, N. Verma, A. Williams, S. O. Burns,  
754 S. Savic, A. G. Richter, Outcomes following SARS-CoV-2 infection in patients with primary and  
755 secondary immunodeficiency in the United Kingdom. *Clin Exp Immunol*, uxac008 (2022).

- 756 15. D. Arroyo-Sánchez, O. Cabrera-Marante, R. Laguna-Goya, P. Almendro-Vázquez, O.  
757 Carretero, F. J. Gil-Etayo, P. Suárez-Fernández, P. Pérez-Romero, E. R. de Frías, A. Serrano,  
758 L. M. Allende, D. Pleguezuelo, E. Paz-Artal, Immunogenicity of Anti-SARS-CoV-2 Vaccines in  
759 Common Variable Immunodeficiency. *J Clin Immunol.* 42, 240–252 (2022).
- 760 16. S. A. Apostolidis, M. Kakara, M. M. Painter, R. R. Goel, D. Mathew, K. Lenzi, A. Rezk, K. R.  
761 Patterson, D. A. Espinoza, J. C. Kadri, D. M. Markowitz, C. E. Markowitz, I. Mexhitaj, D. Jacobs,  
762 A. Babb, M. R. Betts, E. T. L. Prak, D. Weiskopf, A. Grifoni, K. A. Lundgreen, S. Gouma, A.  
763 Sette, P. Bates, S. E. Hensley, A. R. Greenplate, E. J. Wherry, R. Li, A. Bar-Or, Cellular and  
764 humoral immune responses following SARS-CoV-2 mRNA vaccination in patients with multiple  
765 sclerosis on anti-CD20 therapy. *Nat Med.* 27, 1990–2001 (2021).
- 766 17. E. Azzolini, C. Pozzi, L. Germagnoli, B. Oresta, N. Carriglio, M. Calleri, C. Selmi, M. D.  
767 Santis, S. Finazzi, C. Carlo-Stella, A. Bertuzzi, F. Motta, A. Ceribelli, A. Mantovani, F. Bonelli,  
768 M. Rescigno, mRNA COVID-19 vaccine booster fosters B- and T-cell responses in  
769 immunocompromised patients. *Life Sci Alliance.* 5, e202201381 (2022).
- 770 18. N. A. Kennedy, S. Lin, J. R. Goodhand, N. Chanchlani, B. Hamilton, C. Bewshea, R. Nice,  
771 D. Chee, J. F. Cummings, A. Fraser, P. M. Irving, N. Kamperidis, K. B. Kok, C. A. Lamb, J.  
772 Macdonald, S. Mehta, R. C. Pollok, T. Raine, P. J. Smith, A. M. Verma, S. Jochum, T. J.  
773 McDonald, S. Sebastian, C. W. Lees, N. Powell, T. Ahmad, C. to the C. I. study, *Gut*, in press,  
774 doi:10.1136/gutjnl-2021-324789.
- 775 19. S. K. Mahil, K. Bechman, A. Raharja, C. Domingo-Vila, D. Baudry, M. A. Brown, A. P. Cope,  
776 T. Dasandi, C. Graham, T. Lechmere, M. H. Malim, F. Meynell, E. Pollock, J. Seow, K.  
777 Sychowska, J. N. Barker, S. Norton, J. B. Galloway, K. J. Doores, T. I. M. Tree, C. H. Smith,  
778 The effect of methotrexate and targeted immunosuppression on humoral and cellular immune  
779 responses to the COVID-19 vaccine BNT162b2: a cohort study. *Lancet Rheumatology.* 3,  
780 e627–e637 (2021).
- 781 20. T. Bachelet, J.-P. Bourdenx, C. Martinez, S. Mucha, P. Martin-Dupont, V. Perier, A.  
782 Pommereau, Humoral response after SARS-CoV-2 mRNA vaccines in dialysis patients:  
783 Integrating anti-SARS-CoV-2 Spike-Protein-RBD antibody monitoring to manage dialysis  
784 centers in pandemic times. *Plos One.* 16, e0257646 (2021).
- 785 21. C. Danthu, S. Hantz, A. Dahlem, M. Duval, B. Ba, M. Guibbert, Z. E. Ouafi, S. Ponsard, I.  
786 Berrahal, J. M. Achard, F. Bocquentin, V. Allot, J. P. Rerolle, S. Alain, F. Toure, *J Am Soc*  
787 *Nephrol*, in press, doi:10.1681/asn.2021040490.
- 788 22. P. Deepak, W. Kim, M. A. Paley, M. Yang, A. B. Carvidi, E. G. Demissie, A. A. El-Qunni, A.  
789 Haile, K. Huang, B. Kinnett, M. J. Liebeskind, Z. Liu, L. E. McMorrow, D. Paez, N. Pawar, D. C.  
790 Perantie, R. E. Schriefer, S. E. Sides, M. Thapa, M. Gergely, S. Abushamma, S. Akuse, M.  
791 Klebert, L. Mitchell, D. Nix, J. Graf, K. E. Taylor, S. Chahin, M. A. Ciorba, P. Katz, M.  
792 Matloubian, J. A. O'Halloran, R. M. Presti, G. F. Wu, S. P. J. Whelan, W. J. Buchser, L. S.  
793 Gensler, M. C. Nakamura, A. H. Ellebedy, A. H. J. Kim, Effect of Immunosuppression on the  
794 Immunogenicity of mRNA Vaccines to SARS-CoV-2. *Ann Intern Med.* 174, M21-1757 (2021).
- 795 23. L. P. M. van Leeuwen, C. H. GeurtsvanKessel, P. M. Ellerbroek, G. J. de Bree, J. Potjewijd,  
796 A. Rutgers, H. Jolink, F. van de Veerdonk, E. C. M. van Gorp, F. de Wilt, S. Bogers, L.  
797 Gommers, D. Geers, A. H. W. Bruns, H. L. Leavis, J. W. van Haga, B. A. Lemkes, A. van der



- 798 Veen, S. F. J. de Kruijf-Bazen, P. van Paassen, K. de Leeuw, A. A. J. M. van de Ven, P. H.  
799 Verbeek-Menken, A. van Wengen, S. M. Arend, A. J. Ruten-Budde, M. W. van der Ent, P. M.  
800 van Hagen, R. W. Sanders, M. Grobben, K. van der Straten, J. A. Burger, M. Poniman, S.  
801 Nierkens, M. J. van Gils, R. D. de Vries, V. A. S. H. Dalm, Immunogenicity of the mRNA-1273  
802 COVID-19 vaccine in adult patients with inborn errors of immunity. *J Allergy Clin Immunol*  
803 (2022), doi:10.1016/j.jaci.2022.04.002.
- 804 24. O. Zimmerman, A. M. A. Doss, P. Kaplonek, C.-Y. Liang, L. A. VanBlargan, R. E. Chen, J.  
805 M. Monroy, H. J. Wedner, A. Kulczycki, T. L. Mantia, C. C. O’Shaughnessy, H. G. Davis-Adams,  
806 H. L. Bertera, L. J. Adams, S. Raju, F. R. Zhao, C. J. Rigell, T. B. Dy, A. L. Kau, Z. Ren, J. S.  
807 Turner, J. A. O’Halloran, R. M. Presti, D. H. Fremont, P. L. Kendall, A. H. Ellebedy, G. Alter, M.  
808 S. Diamond, mRNA vaccine boosting enhances antibody responses against SARS-CoV-2  
809 Omicron variant in individuals with antibody deficiency syndromes. *Cell Reports Medicine*,  
810 100653 (2022).
- 811 25. A. Durandy, S. Kracker, A. Fischer, Primary antibody deficiencies. *Nat Rev Immunol.* 13,  
812 519–533 (2013).
- 813 26. H. Abolhassani, L. Hammarström, C. Cunningham-Rundles, Current genetic landscape in  
814 common variable immune deficiency. *Blood.* 135, 656–667 (2020).
- 815 27. G. de Valles-Ibáñez, A. Esteve-Solé, M. Piquer, E. A. González-Navarro, J. Hernandez-  
816 Rodriguez, H. Laayouni, E. González-Roca, A. M. Plaza-Martin, Á. Deyà-Martínez, A. Martín-  
817 Nalda, M. Martínez-Gallo, M. García-Prat, L. del Pino-Molina, I. Cuscó, M. Codina-Solà, L.  
818 Batlle-Masó, M. Solís-Moruno, T. Marquès-Bonet, E. Bosch, E. López-Granados, J. I. Aróstegui,  
819 P. Soler-Palacín, R. Colobran, J. Yagüe, L. Alsina, M. Juan, F. Casals, Evaluating the Genetics  
820 of Common Variable Immunodeficiency: Monogenetic Model and Beyond. *Front Immunol.* 9,  
821 636 (2018).
- 822 28. D. J. A. Bogaert, M. Dullaers, B. N. Lambrecht, K. Y. Vermaelen, E. D. Baere, F. Haerynck,  
823 Genes associated with common variable immunodeficiency: one diagnosis to rule them all? *J*  
824 *Med Genet.* 53, 575 (2016).
- 825 29. P. Maffucci, C. A. Filion, B. Boisson, Y. Itan, L. Shang, J.-L. Casanova, C. Cunningham-  
826 Rundles, Genetic Diagnosis Using Whole Exome Sequencing in Common Variable  
827 Immunodeficiency. *Front Immunol.* 7, 220 (2016).
- 828 30. P. Tuijnenburg, H. L. Allen, S. O. Burns, D. Greene, M. H. Jansen, E. Staples, J. Stephens,  
829 K. J. Carss, D. Biasci, H. Baxendale, M. Thomas, A. Chandra, S. Kiani-Alikhan, H. J. Longhurst,  
830 S. L. Seneviratne, E. Oksenhendler, I. Simeoni, G. J. de Bree, A. T. J. Tool, E. M. M. van  
831 Leeuwen, E. H. T. M. Ebberink, A. B. Meijer, S. Tuna, D. Whitehorn, M. Brown, E. Turro, A. J.  
832 Thrasher, K. G. C. Smith, J. E. Thaventhiran, T. W. Kuijpers, Z. Adhya, H. Alachkar, A.  
833 Anantharachagan, R. Antrobus, G. Arumugakani, C. Bacchelli, H. Baxendale, C. Bethune, S.  
834 Bibi, B. Boardman, C. Booth, M. Browning, M. Brownlie, S. Burns, A. Chandra, H. Clifford, N.  
835 Cooper, S. Davies, J. Dempster, L. Devlin, R. Doffinger, E. Drewe, D. Edgar, W. Egner, T. El-  
836 Shanawany, B. Gaspar, R. Ghurye, K. Gilmour, S. Goddard, P. Gordins, S. Grigoriadou, S.  
837 Hackett, R. Hague, L. Harper, G. Hayman, A. Herwadkar, S. Hughes, A. Huissoon, S. Jolles, J.  
838 Jones, P. Kelleher, N. Klein, T. Kuijpers, D. Kumararatne, J. Laffan, H. L. Allen, S. Lear, H.  
839 Longhurst, L. Lorenzo, J. Maimaris, A. Manson, E. McDermott, H. Millar, A. Mistry, V. Morrisson,  
840 S. Murng, I. Nasir, S. Nejentsev, S. Noorani, E. Oksenhendler, M. Ponsford, W. Qasim, E.

- 841 Quinn, I. Quinti, A. Richter, C. Samarghitean, R. Sargur, S. Savic, S. Seneviratne, C. Sewall, F.  
842 Shackley, I. Simeoni, K. G. C. Smith, E. Staples, H. Stauss, C. Steele, J. Thaventhiran, M.  
843 Thomas, A. Thrasher, S. Welch, L. Willcocks, S. Workman, A. Worth, N. Yeatman, P. Yong, S.  
844 Ashford, J. Bradley, D. Fletcher, T. Hammerton, R. James, N. Kingston, W. Ouwehand, C.  
845 Penkett, F. L. Raymond, K. Stirrups, M. Veltman, T. Young, S. Ashford, M. Brown, N. Clements-  
846 Brod, J. Davis, E. Dewhurst, M. Erwood, A. Frary, R. Linger, J. Martin, S. Papadia, K.  
847 Rehnstrom, W. Astle, A. Attwood, M. Bleda, K. Carss, L. Daugherty, S. Deevi, S. Graf, D.  
848 Greene, C. Halmagyi, M. Haimel, F. Hu, R. James, H. L. Allen, V. Matser, S. Meacham, K.  
849 Megy, C. Penkett, O. Shamardina, K. Stirrups, C. Titterton, S. Tuna, E. Turro, P. Yu, J. von  
850 Ziegenweldt, A. Furnell, R. Mapeta, I. Simeoni, S. Staines, J. Stephens, K. Stirrups, D.  
851 Whitehorn, P. Rayner-Matthews, C. Watt, Loss-of-function nuclear factor  $\kappa$ B subunit 1 (NFKB1)  
852 variants are the most common monogenic cause of common variable immunodeficiency in  
853 Europeans. *J Allergy Clin Immunol.* 142, 1285–1296 (2018).
- 854 31. L. J. Maarschalk-Ellebroek, I. M. Hoepelman, P. M. Ellebroek, Immunoglobulin treatment in  
855 primary antibody deficiency. *Int J Antimicrob Ag.* 37, 396–404 (2011).
- 856 32. J. Prevot, S. Jolles, Global immunoglobulin supply: steaming towards the iceberg? *Curr*  
857 *Opin Allergy Cl.* 20, 557–564 (2020).
- 858 33. A. L. Miller, N. L. Rider, R. B. Pyles, B. Judy, X. Xie, P.-Y. Shi, T. G. Ksiazek, The arrival of  
859 SARS-CoV-2–neutralizing antibodies in a currently available commercial immunoglobulin. *J*  
860 *Allergy Clin Immunol.* 149, 1958–1959 (2022).
- 861 34. W. B. Alsoussi, J. S. Turner, J. B. Case, H. Zhao, A. J. Schmitz, J. Q. Zhou, R. E. Chen, T.  
862 Lei, A. A. Rizk, K. M. McIntire, E. S. Winkler, J. M. Fox, N. M. Kafai, L. B. Thackray, A. O.  
863 Hassan, F. Amanat, F. Krammer, C. T. Watson, S. H. Kleinstein, D. H. Fremont, M. S. Diamond,  
864 A. H. Ellebedy, A Potently Neutralizing Antibody Protects Mice against SARS-CoV-2 Infection. *J*  
865 *Immunol.* 205, j2000583 (2020).
- 866 35. A. O. Hassan, J. B. Case, E. S. Winkler, L. B. Thackray, N. M. Kafai, A. L. Bailey, B. T.  
867 McCune, J. M. Fox, R. E. Chen, W. B. Alsoussi, J. S. Turner, A. J. Schmitz, T. Lei, S. Shrihari,  
868 S. P. Keeler, D. H. Fremont, S. Greco, P. B. McCray, S. Perlman, M. J. Holtzman, A. H.  
869 Ellebedy, M. S. Diamond, A SARS-CoV-2 Infection Model in Mice Demonstrates Protection by  
870 Neutralizing Antibodies. *Cell.* 182, 744-753.e4 (2020).
- 871 36. G. E. Weiss, P. D. Crompton, S. Li, L. A. Walsh, S. Moir, B. Traore, K. Kayentao, A.  
872 Ongoiba, O. K. Doumbo, S. K. Pierce, Atypical Memory B Cells Are Greatly Expanded in  
873 Individuals Living in a Malaria-Endemic Area. *J Immunol.* 183, 2176–2182 (2009).
- 874 37. H. J. Sutton, R. Aye, A. H. Idris, R. Vistein, E. Nduati, O. Kai, J. Mwacharo, X. Li, X. Gao, T.  
875 D. Andrews, M. Koutsakos, T. H. O. Nguyen, M. Nekrasov, P. Milburn, A. Eltahla, A. A. Berry,  
876 N. KC, S. Chakravarty, B. K. L. Sim, A. K. Wheatley, S. J. Kent, S. L. Hoffman, K. E. Lyke, P.  
877 Bejon, F. Luciani, K. Kedzierska, R. A. Seder, F. M. Ndungu, I. A. Cockburn, Atypical B cells are  
878 part of an alternative lineage of B cells that participates in responses to vaccination and  
879 infection in humans. *Cell Reports.* 34, 108684 (2021).
- 880 38. M.-L. Golinski, M. Demeules, C. Derambure, G. Riou, M. Maho-Vaillant, O. Boyer, P. Joly,  
881 S. Calbo, CD11c+ B Cells Are Mainly Memory Cells, Precursors of Antibody Secreting Cells in  
882 Healthy Donors. *Front Immunol.* 11, 32 (2020).

- 883 39. H. Rincon-Arevalo, A. Wiedemann, A.-L. Stefanski, M. Lettau, F. Szelinski, S. Fuchs, A. P.  
884 Frei, M. Steinberg, T. Kam-Thong, K. Hatje, B. Keller, K. Warnatz, A. Radbruch, A. C. Lino, E.  
885 Schrezenmeier, T. Dörner, Deep Phenotyping of CD11c+ B Cells in Systemic Autoimmunity and  
886 Controls. *Front Immunol.* 12, 635615 (2021).
- 887 40. S. Shalpour, J. Font-Burgada, G. D. Caro, Z. Zhong, E. Sanchez-Lopez, D. Dhar, G.  
888 Willimsky, M. Ammirante, A. Strasner, D. E. Hansel, C. Jamieson, C. J. Kane, T. Klatte, P.  
889 Birner, L. Kenner, M. Karin, Immunosuppressive plasma cells impede T-cell-dependent  
890 immunogenic chemotherapy. *Nature.* 521, 94–98 (2019).
- 891 41. P. A. Mudd, A. A. Minervina, M. V. Pogorelyy, J. S. Turner, W. Kim, E. Kalaidina, J.  
892 Petersen, A. J. Schmitz, T. Lei, A. Haile, A. M. Kirk, R. C. Mettelman, J. C. Crawford, T. H. O.  
893 Nguyen, L. C. Rowntree, E. Rosati, K. A. Richards, A. J. Sant, M. K. Klebert, T. Suessen, W. D.  
894 Middleton, S. S. Team, J. H. Estep, S. Schultz-Cherry, M. A. McGargill, A. Gaur, J. Hoffman,  
895 M. Mori, L. Tang, E. Tuomanen, R. Webby, R. T. Hayden, H. Hakim, D. R. Hijano, K. J. Allison,  
896 E. K. Allen, R. Bajracharya, W. Awad, L.-A. V. de Velde, B. L. Clark, T. L. Wilson, A. Souquette,  
897 A. Castellaw, R. H. Dallas, A. Gowen, T. P. Fabrizio, C.-Y. Lin, D. C. Brice, S. Cherry, E. K.  
898 Roubidoux, V. Cortez, P. Freiden, N. Wohlgemuth, K. Whitt, J. Wolf, S. A. Teefey, J. A.  
899 O'Halloran, R. M. Presti, K. Kedzierska, J. Rossjohn, P. G. Thomas, A. H. Ellebedy, SARS-CoV-  
900 2 mRNA vaccination elicits a robust and persistent T follicular helper cell response in humans.  
901 *Cell.* 185, 603-613.e15 (2022).
- 902 42. L. Loyal, J. Braun, L. Henze, B. Kruse, M. Dingeldey, U. Reimer, F. Kern, T. Schwarz, M.  
903 Mangold, C. Unger, F. Dörfler, S. Kadler, J. Rosowski, K. Gürçan, Z. Uyar-Aydin, M. Frentsch,  
904 F. Kurth, K. Schnatbaum, M. Eckey, S. Hippenstiel, A. Hocke, M. A. Müller, B. Sawitzki, S.  
905 Miltenyi, F. Paul, M. A. Mall, H. Wenschuh, S. Voigt, C. Drosten, R. Lauster, N. Lachman, L.-E.  
906 Sander, V. M. Corman, J. Röhmel, L. Meyer-Arndt, A. Thiel, C. Giesecke-Thiel, Cross-reactive  
907 CD4+ T cells enhance SARS-CoV-2 immune responses upon infection and vaccination.  
908 *Science.* 374, eabh1823 (2021).
- 909 43. A. G. Dykema, B. Zhang, B. A. Woldemeskel, C. C. Garliss, L. S. Cheung, D. Choudhury, J.  
910 Zhang, L. Aparicio, S. Bom, R. Rashid, J. X. Caushi, E. H.-C. Hsiue, K. Cascino, E. A.  
911 Thompson, A. K. Kwaa, D. Singh, S. Thapa, A. A. Ordonez, A. Pekosz, F. R. D'Alessio, J. D.  
912 Powell, S. Yegnasubramanian, S. Zhou, D. M. Pardoll, H. Ji, A. L. Cox, J. N. Blankson, K. N.  
913 Smith, Functional characterization of CD4+ T-cell receptors cross-reactive for SARS-CoV-2 and  
914 endemic coronaviruses. *J Clin Invest.* 131 (2021), doi:10.1172/jci146922.
- 915 44. B. J. Laidlaw, A. H. Ellebedy, The germinal centre B cell response to SARS-CoV-2. *Nat Rev*  
916 *Immunol.* 22, 7–18 (2022).
- 917 45. R. R. Goel, S. A. Apostolidis, M. M. Painter, D. Mathew, A. Pattekar, O. Kuthuru, S. Gouma,  
918 P. Hicks, W. Meng, A. M. Rosenfeld, S. Dysinger, K. A. Lundgreen, L. Kuri-Cervantes, S.  
919 Adamski, A. Hicks, S. Korte, D. A. Oldridge, A. E. Baxter, J. R. Giles, M. E. Weirick, C. M.  
920 McAllister, J. Dougherty, S. Long, K. D'Andrea, J. T. Hamilton, M. R. Betts, E. T. L. Prak, P.  
921 Bates, S. E. Hensley, A. R. Greenplate, E. J. Wherry, Distinct antibody and memory B cell  
922 responses in SARS-CoV-2 naïve and recovered individuals following mRNA vaccination. *Sci*  
923 *Immunol.* 6, eabi6950 (2021).
- 924 46. F. Muecksch, Z. Wang, A. Cho, C. Gaebler, T. B. Tanfous, J. DaSilva, E. Bednarski, V.  
925 Ramos, S. Zong, B. Johnson, R. Raspe, D. Schaefer-Babajew, I. Shimeliovich, M. Daga, K.-H.

- 926 Yao, F. Schmidt, K. G. Millard, M. Turroja, M. Jankovic, T. Y. Oliveira, A. Gazumyan, M.  
927 Caskey, T. Hatzioannou, P. D. Bieniasz, M. C. Nussenzweig, Increased memory B cell potency  
928 and breadth after a SARS-CoV-2 mRNA boost. *Nature*, 1–7 (2022).
- 929 47. A. F. Salinas, E. P. Mortari, S. Terreri, C. Quintarelli, F. Pulvirenti, S. D. Cecca, M. Guercio,  
930 C. Milito, L. Bonanni, S. Auria, L. Romaggioli, G. Cusano, C. Albano, S. Zaffina, C. F. Perno, G.  
931 Spadaro, F. Locatelli, R. Carsetti, I. Quinti, SARS-CoV-2 Vaccine Induced Atypical Immune  
932 Responses in Antibody Defects: Everybody Does their Best. *J Clin Immunol.* 41, 1709–1722  
933 (2021).
- 934 48. F. Pulvirenti, A. F. Salinas, C. Milito, S. Terreri, E. P. Mortari, C. Quintarelli, S. D. Cecca, G.  
935 Lagnese, A. Punziano, M. Guercio, L. Bonanni, S. Auria, F. Villani, C. Albano, F. Locatelli, G.  
936 Spadaro, R. Carsetti, I. Quinti, B Cell Response Induced by SARS-CoV-2 Infection Is Boosted  
937 by the BNT162b2 Vaccine in Primary Antibody Deficiencies. *Cells.* 10, 2915 (2021).
- 938 49. J. B. Case, S. Mackin, J. Errico, Z. Chong, E. A. Madden, B. Guarino, M. A. Schmid, K.  
939 Rosenthal, K. Ren, A. Jung, L. Droit, S. A. Handley, P. J. Halfmann, Y. Kawaoka, J. E. Crowe,  
940 D. H. Fremont, H. W. Virgin, Y.-M. Loo, M. T. Esser, L. A. Purcell, D. Corti, M. S. Diamond,  
941 *Biorxiv*, in press, doi:10.1101/2022.03.17.484787.
- 942 50. J. S. Turner, J. A. O’Halloran, E. Kalaidina, W. Kim, A. J. Schmitz, J. Q. Zhou, T. Lei, M.  
943 Thapa, R. E. Chen, J. B. Case, F. Amanat, A. M. Rauseo, A. Haile, X. Xie, M. K. Klebert, T.  
944 Suessen, W. D. Middleton, P.-Y. Shi, F. Krammer, S. A. Teefey, M. S. Diamond, R. M. Presti, A.  
945 H. Ellebedy, SARS-CoV-2 mRNA vaccines induce persistent human germinal centre responses.  
946 *Nature.* 596, 109–113 (2021).
