# Supplementary material for: SARS-CoV-2 booster vaccination rescues attenuated IgG1 memory B cell response in primary antibody deficiency patients
Source: bioRxiv or medRxiv preprint supplement (doi:10.1101/2022.07.14.22276948), 2022-07-15
Supplement: Supplementary file [file media-1.pdf]

1 Supplementary Material for

2

3 **SARS-CoV-2 booster vaccination rescues attenuated IgG1 memory B**  
4 **cell response in primary antibody deficiency patients**

5

6 Frank J. Lin<sup>1,9</sup>, Alexa Michelle Altman Doss<sup>2,9</sup>, Hannah G. Davis-Adams<sup>1</sup>, Lucas J. Adams<sup>3</sup>,  
7 Christopher H. Hanson<sup>1</sup>, Laura A. VanBlargan<sup>1</sup>, Chieh-Yu Liang<sup>1,3</sup>, Rita. E. Chen<sup>1,3</sup>, Jennifer Marie  
8 Monroy<sup>1</sup>, H. James Wedner<sup>1</sup>, Anthony Kulczycki<sup>1</sup>, Tarisa L. Mantia<sup>1</sup>, Caitlin C. O’Shaughnessy<sup>1</sup>,  
9 Saravanan Raju<sup>3</sup>, Fang R. Zhao<sup>1</sup>, Elise Rizzi<sup>1</sup>, Christopher J. Rigell<sup>1</sup>, Tiffany Biason Dy<sup>1</sup>, Andrew  
10 L. Kau<sup>1,4</sup>, Zhen Ren<sup>1</sup>, Jackson Turner<sup>3</sup>, Jane A. O’Halloran<sup>1</sup>, Rachel M. Presti<sup>1, 6</sup>, Daved H.  
11 Fremont<sup>3</sup>, Peggy L. Kendall<sup>1</sup>, Ali H. Ellebedy<sup>3, 5, 6</sup>, Philip A. Mudd<sup>6, 8</sup>, Michael S. Diamond<sup>1,3,5,6, 7</sup>,  
12 Ofer Zimmerman<sup>\*1</sup>, and Brian J. Laidlaw<sup>\*1</sup>

13

14

15 \* Correspondence should be addressed to Brian Laidlaw (brian.laidlaw@wustl.edu) and Ofer  
16 Zimmerman (zimmero@wustl.edu)

17

18 **This PDF includes:**

19 Supplementary methods

20 Supplementary references

21 Fig. S1. Baseline phenotype of PAD patients and healthy donor cohorts.

22 Fig S2. COVID-19-experienced PAD patients display elevated RBD-specific B cell response  
23 following primary vaccination series.

24 Fig. S3. COVID-19-naive PAD patients display elevated RBD-specific B cell response following  
25 booster vaccination.

26 Fig. S4. Isotype composition of SARS-CoV-2 RBD-specific memory B cell response following  
27 vaccination in PAD patients.

28 Fig. S5. RBD-specific memory B cells from PAD patients display reduced CD11c expression  
29 class.

30 Table S1. Characteristics of patient cohort

31 Table S2. Cellular phenotype of patient cohort

32 Table S3. PAD patient laboratory values

33 Table S4. PAD patient responses to other vaccine antigens at time of diagnosis

34 **SUPPLEMENTARY METHODS**

35 **Preparation of peripheral blood mononuclear cells.** Patient blood was collected in sodium  
36 citrate cell preparation tubes (BD Biosciences). Tubes were centrifuged at room temperature for  
37 30 minutes at 1650 x *g* without brake. The mononuclear cells and plasma layer were then  
38 transferred to a 50mL conical and centrifuged at room temperature for 10 minutes at 256 x *g*.  
39 Supernatant was removed without disturbing the cell pellet. Cells were resuspended in PBS and  
40 all cells of the same subject were combined into one 15-mL conical tube. Cells were centrifuged  
41 as above. Supernatant was removed without disturbing the cell pellet and cells were  
42 resuspended in 5mL of ACK lysing buffer (Thermo Fisher) for 5 minutes. Cells were washed  
43 with PBS, counted, washed again with PBS, resuspended in 10% dimethylsulfoxide in FBS at  
44 10<sup>6</sup> cells per mL and aliquoted into cryovials. Cryovials were transferred to a freezing container  
45 (Daigger Scientific, Mr. Frosty) and placed in a -80°C freezer overnight before being transferred  
46 to liquid nitrogen for storage.

47  
48 **Antibodies for flow cytometry staining.** Staining for flow cytometry was performed using  
49 cryopreserved PBMC samples. Cryopreserved samples were thawed in a 37 °C water bath and  
50 added to tube containing RPMI with 10% FBS and 1% Penicillin Streptomycin solution (Fisher).  
51 Cells were then centrifuged at 300x *g* at room temperature, resuspended in 10% RPMI, and  
52 counted. Cells were then aliquoted to a 96 well plate and centrifuged at 810 x *g* for 2 minutes at  
53 4 °C. The cells were then washed with PBS containing 2% FBS, centrifuged, and then incubated  
54 with the primary antibody mix for 30 minutes on ice. Samples that were stained with tetramer  
55 containing antibody cocktail were incubated for 45 minutes. Cells were then washed three times  
56 with 2% PBS and incubated with secondary antibody mix for an additional 30 minutes. Samples  
57 were then washed an additional three times with 2% PBS before being resuspended for flow  
58 cytometry analysis. Flow cytometry data were acquired on a Cytex Aurora and were analyzed  
59 with FlowJo software (TreeStar).

60  
61 The following antibodies were used for flow cytometry staining: Brilliant Violet 711(BV711) anti-  
62 CD11c (301630), BV750 anti-CD19 (302262), allophycocyanin (APC)/Fire 810 anti-CD3  
63 (344858), BV510 anti-IgD (348220), BV605 anti-IgM (314524), phycoerythrin (PE)/Dazzle 594  
64 anti-CXCR5 (356928), APC anti-his (362605), PE/Fire 810 anti-CD27 (302859), APC/Fire 750  
65 anti-CD20 (302358), Zombie NIR (423106), phycoerythrin-indotricarbocyanine (PE-Cy7) anti-  
66 CD71 (334112), BV650 BV570 anti-CD45RO (304226), FITC anti-CCR7 (353216), BV605 anti-

67 HLA-DR (307640), Alexa Fluor 700 anti-CD4 (344622), Alexa Fluor 594 anti-CD8 (301056),  
68 peridinin chlorophyll protein Cy5.5 (PerCpCy5.5) (304122), PE/Fire 810 anti-CD27 (302859),  
69 BV421 anti-ICOS (313524) (all from Biolegend); Biotin anti-IgG3 (OB9210-08), Alexa Fluor 555  
70 anti-IgG2 (OB907032), PE anti-IgG1 (OB905409), FITC anti-IgA (CBL114FMI), Brilliant Blue 700  
71 (BB700) anti-CD38 (BDB566445), PE-Cy7 anti-PD1 (BDB561272) (all from Fisher).

72 **His-tagged SARS-CoV-2 protein purification.** Genes encoding SARS-CoV-2 Wuhan-Hu-1  
73 spike protein (residues 1-1213, GenBank: MN908947.3), the Wuhan-Hu-1 RBD (residues 319-  
74 514), and B.1.1.529 (BA.1) spike protein were cloned into a pCAGGS mammalian expression  
75 vector with a C-terminal hexahistidine tag. Both spike proteins were prefusion stabilized and  
76 expression optimized with six proline substitutions (F817P, A892P, A899P, A942P, K986P,  
77 V987P), with a disrupted S1/S2 furin cleavage site and a C-terminal foldon trimerization motif  
78 (YIPEAPRDGQAYVRKDGWVLLSTFL) (50). Expi293F cells were transiently transfected, and  
79 proteins were recovered via cobalt-charged resin chromatography (G-Biosciences) as  
80 previously described (34, 35) .

81 **HLA class II tetramers.** HLA class II tetramers representing the HLA-DPA1\*01:03/HLA-  
82 DPB1\*04:01-restricted SARS-CoV-2 spike (S) protein epitopes S<sub>167-180</sub> (TFEYVSQLMDLE)  
83 and S<sub>816-830</sub> (SFIEDLLFNKVTLD) were constructed by cloning the relevant peptides into an  
84 AbVec vector system containing the appropriate HLA alpha and beta chains linked to the  
85 peptide of interest via a flexible linker at the N-terminus of the beta chain (41–43). This system  
86 includes corresponding leucine zipper motifs on the alpha and beta chains to promote HLA  
87 monomer stability. Proteins were expressed in 293F cells transfected with the appropriate  
88 AbVec vector. Purified HLA monomer was biotinylated with BioA enzyme in biotinylation buffer  
89 (0.2 M NaCl, 0.1 M Tris pH7.5, 5 mM MgCl<sub>2</sub>, 5 mM ATP, 0.4 mM Biotin, 5 uM Leupeptin, 1 uM  
90 Pepstatin, and 0.2 mM PMSF). The monomer was then tetramerized and fluorochrome labeled  
91 by adding Streptavidin-R-Phycoerythrin (Agilent) to the S<sub>167-180</sub> monomer or Streptavidin-  
92 Allophycocyanin (Agilent) to the S<sub>816-830</sub> monomer (51).

93 **Focus reduction neutralization test.** Neutralizing antibody titers were performed with  
94 authentic SARS-CoV-2 strains and variants as previous described (24).

95

96 **SUPPLEMENTAL REFERENCES**

- 97 51. C.-L. Hsieh, J. A. Goldsmith, J. M. Schaub, A. M. DiVenere, H.-C. Kuo, K. Javanmardi, K. C.  
98 Le, D. Wrapp, A. G. Lee, Y. Liu, C.-W. Chou, P. O. Byrne, C. K. Hjorth, N. V. Johnson, J. Ludes-  
99 Meyers, A. W. Nguyen, J. Park, N. Wang, D. Amengor, J. J. Lavinder, G. C. Ippolito, J. A.  
100 Maynard, I. J. Finkelstein, J. S. McLellan, Structure-based design of prefusion-stabilized SARS-  
101 CoV-2 spikes. *Science*. 369, eabd0826 (2020).
- 102 52. R. A. Willis, V. Ramachandiran, J. C. Shires, G. Bai, K. Jeter, D. L. Bell, L. Han, T. Kazarian,  
103 K. C. Ugwu, O. Laur, S. Contreras-Alcantara, D. L. Long, J. D. Altman, Production of Class II  
104 MHC Proteins in Lentiviral Vector-Transduced HEK-293T Cells for Tetramer Staining Reagents.  
105 *Curr Protoc.* 1, e36 (2021).

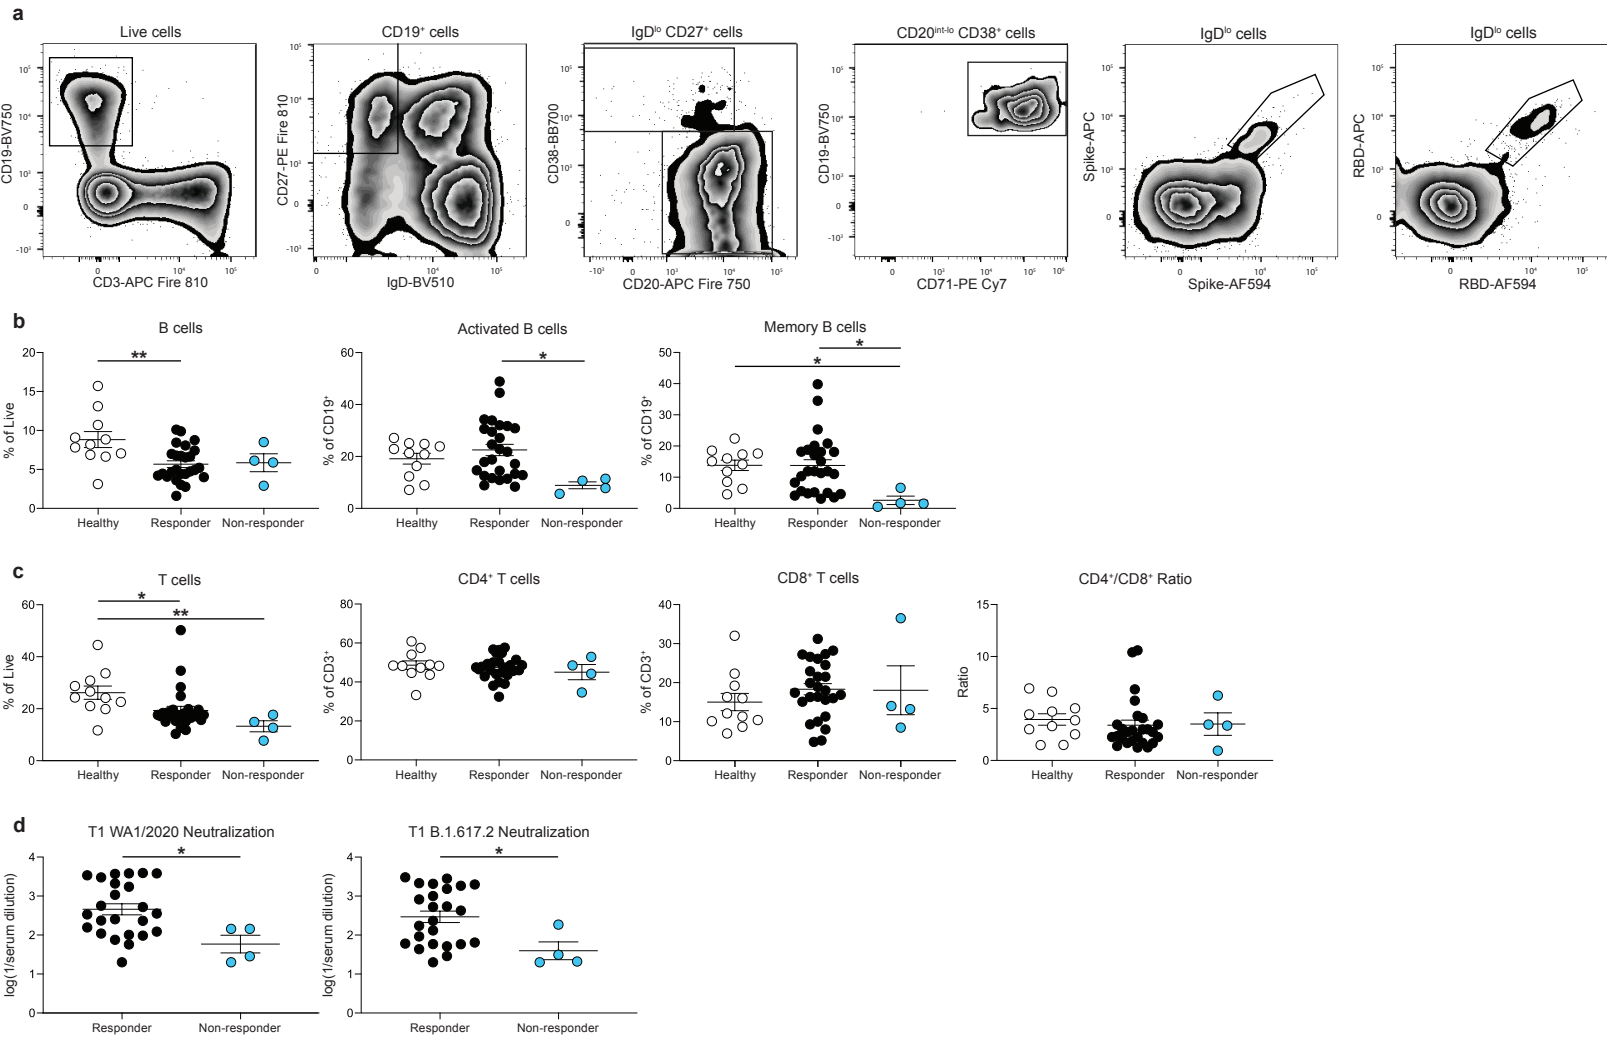

**Figure S1**

106 **Figure S1. Baseline phenotype of PAD patients and healthy donor cohorts. (a)**  
107 Representative B cell flow cytometry gating scheme. **(b)** Percentage of live cells that are B  
108 (CD19<sup>+</sup>CD3<sup>-</sup>) cells at T1 in patient cohorts (left). Percentage of B cells that are activated (IgD<sup>lo</sup>)  
109 cells in patient cohorts (middle) Percentage of B cells that are memory (IgD<sup>lo</sup>CD27<sup>+</sup>) cells in  
110 patient cohorts. (right). **(c)** Percentage of live cells that are T (CD3<sup>+</sup>CD19<sup>-</sup>) cells at T1 in patient  
111 cohorts. (left) Percentage of T cells that are CD4<sup>+</sup> (CD4<sup>+</sup>CD8<sup>-</sup>) cells in patient cohorts (middle left).  
112 Percentage of T cells that are CD8<sup>+</sup> (CD8<sup>+</sup>CD4<sup>-</sup>) in patient cohorts (middle right). Ratio of CD4<sup>+</sup>  
113 to CD8<sup>+</sup> T cells (right). **(d)** Serum neutralizing activity against WA1/2020 (left) and B.1.617.2 (right)  
114 at T1. Non-responder defined as PAD patients in which the CD19<sup>+</sup> IgD<sup>lo</sup> Spike<sup>+</sup> B cells response  
115 was <0.02% of total B cells at T1. Statistical analyses were performed using a one-way ANOVA  
116 with Fisher's least significant difference testing in b, c; or using an unpaired t-test in d. Error bars  
117 were calculated based on the standard error of the mean. (\*,  $p < 0.05$ ; \*\*,  $p < 0.01$ ).  
118

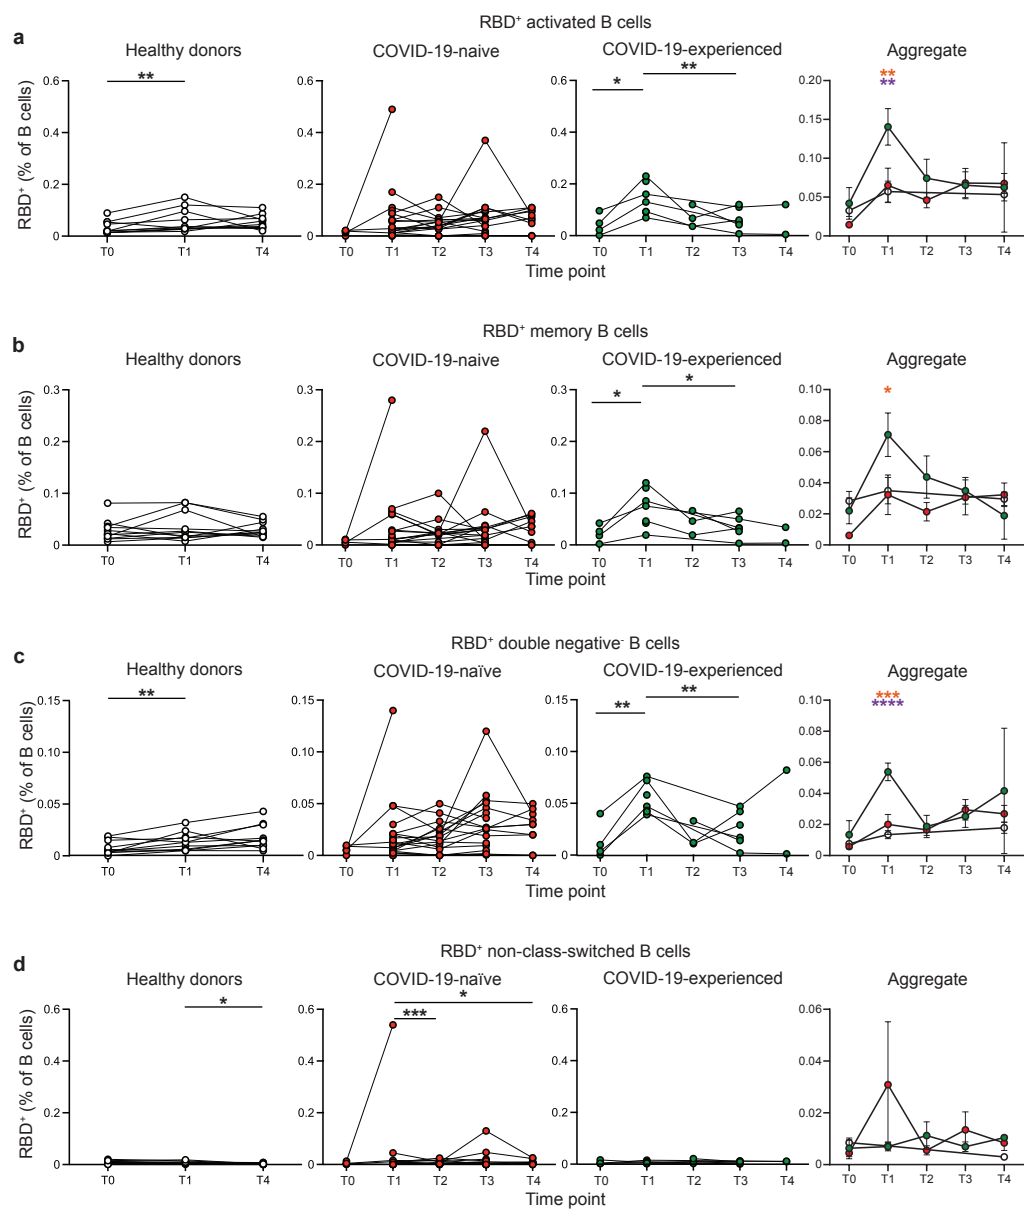

**Figure S2**

119 **Figure S2. COVID-19-experienced PAD patients display elevated RBD-specific B cell**  
120 **response following primary vaccination series.** (a) Percentage of activated RBD<sup>+</sup> cells  
121 amongst the B (Live CD19<sup>+</sup> CD3<sup>-</sup>) cell population in the healthy donor (left, white), COVID-19-  
122 naïve PAD (middle left, red), and COVID-19-experienced PAD (middle right, green) cohorts.  
123 Aggregate of mean percentage of B cells that are RBD<sup>+</sup> activated cells in all groups is shown on  
124 right. (b) Percentage of memory (IgD<sup>lo</sup> CD20<sup>+</sup> CD38<sup>int-lo</sup> CD27<sup>+</sup>) RBD<sup>+</sup> cells amongst the B cell  
125 population in the healthy donor (left, white), COVID-19-naïve PAD (middle, red), and COVID-19-  
126 experienced PAD (middle, green) cohorts. Aggregate of mean percentage of B cells that are RBD<sup>+</sup>  
127 memory cells in all groups is shown on right. (c) Percentage of double negative (IgD<sup>lo</sup> CD20<sup>+</sup>  
128 CD38<sup>int-lo</sup> CD27<sup>-</sup>) RBD<sup>+</sup> cells amongst the B cell population in the healthy donor (left, white),  
129 COVID-19-naïve PAD (middle, red), and COVID-19-experienced PAD (middle, green) cohorts.  
130 Aggregate of mean percentage of B cells that are double negative RBD<sup>+</sup> cells in all groups is  
131 shown on right. (d) Percentage of non-class-switched (IgD<sup>+</sup> CD20<sup>+</sup> CD38<sup>int-lo</sup> CD27<sup>+</sup>) RBD<sup>+</sup> cells  
132 amongst the B cell population in the healthy donor (left, white), COVID-19-naïve PAD (middle,  
133 red), and COVID-19-experienced PAD (middle, green) cohorts. Aggregate of mean percentage  
134 of B cells that are RBD<sup>+</sup> non-class-switched cells in all groups is shown on right. Statistical  
135 analyses were performed using a mixed effects model (for trends found between time points) or  
136 two-way ANOVA (for trends found between groups in the aggregate graphs) with Fisher's least  
137 significant difference testing. Significance testing between time points was limited to comparisons  
138 relative to T1. On the aggregate graphs, all error bars were calculated based on the standard  
139 error of the mean. Above the aggregate graphs, an orange asterisk indicates a comparison  
140 between the COVID-19-naïve and COVID-19-experienced groups, and a purple asterisk indicates  
141 a comparison between the COVID-19-experienced and healthy donor groups (\*,  $p < 0.05$ ; \*\*,  $p <$   
142  $0.01$ ; \*\*\*,  $p < 0.001$ ; \*\*\*\*,  $p < 0.001$ ).

143



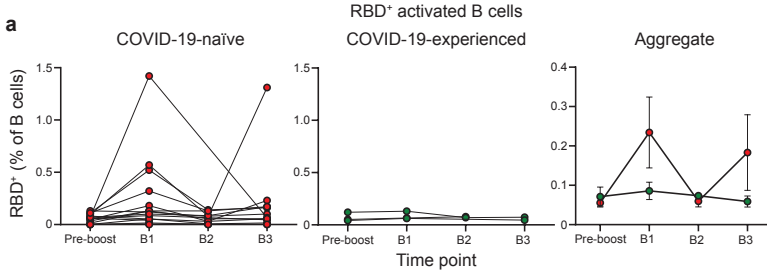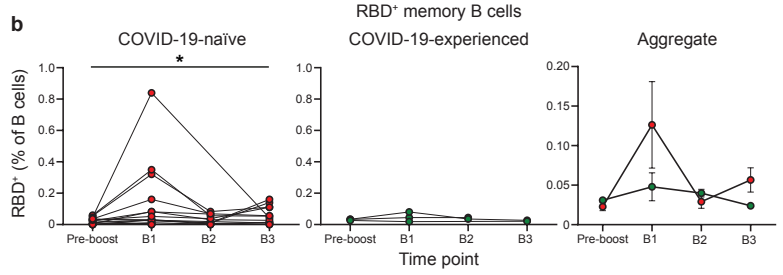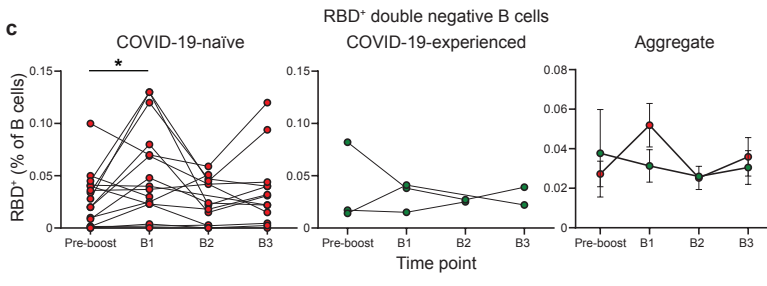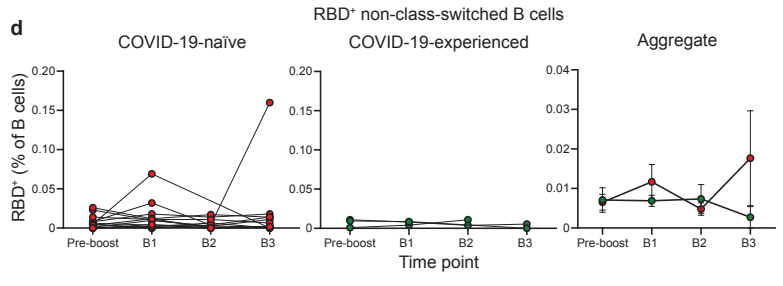

**Figure S3**

144 **Figure S3. COVID-19-naïve PAD patients display elevated RBD-specific B cell response**  
145 **following booster vaccination.** (a) Percentage of activated RBD<sup>+</sup> cells amongst the B (Live  
146 CD19<sup>+</sup> CD3<sup>-</sup>) cell population in the healthy donor (left, white), COVID-19-naïve PAD (middle left,  
147 red), and COVID-19-experienced PAD (middle right, green) cohorts. Aggregate of mean  
148 percentage of B cells that are RBD<sup>+</sup> activated cells in all groups is shown on right. (b)  
149 Percentage of memory (IgD<sup>lo</sup> CD20<sup>+</sup> CD38<sup>int-lo</sup> CD27<sup>+</sup>) RBD<sup>+</sup> cells amongst the B cell population  
150 in the healthy donor (left, white), COVID-19-naïve PAD (middle, red), and COVID-19-  
151 experienced PAD (middle, green) cohorts. Aggregate of mean percentage of B cells that are  
152 RBD<sup>+</sup> memory cells in all groups is shown on right. (c) Percentage of double negative (IgD<sup>lo</sup>  
153 CD20<sup>+</sup> CD38<sup>int-lo</sup> CD27<sup>-</sup>) RBD<sup>+</sup> cells amongst the B cell population in the healthy donor (left,  
154 white), COVID-19-naïve PAD (middle, red), and COVID-19-experienced PAD (middle, green)  
155 cohorts. Aggregate of mean percentage of B cells that are double negative Spike<sup>+</sup> cells in all  
156 groups is shown on right. (d) Percentage of non-class-switched (IgD<sup>+</sup> CD20<sup>+</sup> CD38<sup>int-lo</sup> CD27<sup>+</sup>)  
157 RBD<sup>+</sup> cells amongst the B cell population in the healthy donor (left, white), COVID-19-naïve  
158 PAD (middle, red), and COVID-19-experienced PAD (middle, green) cohorts. Aggregate of  
159 mean percentage of B cells that are RBD<sup>+</sup> non-class-switched cells in all groups is shown on  
160 right. pre-boost group consists of the last sample obtained from each patient prior to booster  
161 vaccination. Statistical analyses were performed using a mixed effects model (for trends found  
162 between time points) with Fisher's least significant difference testing. Significance testing  
163 between time points was limited to comparisons relative to pre-boost (\*,  $p < 0.05$ ). On the  
164 aggregate graphs, error bars were calculated based on the standard error of the mean.  
165

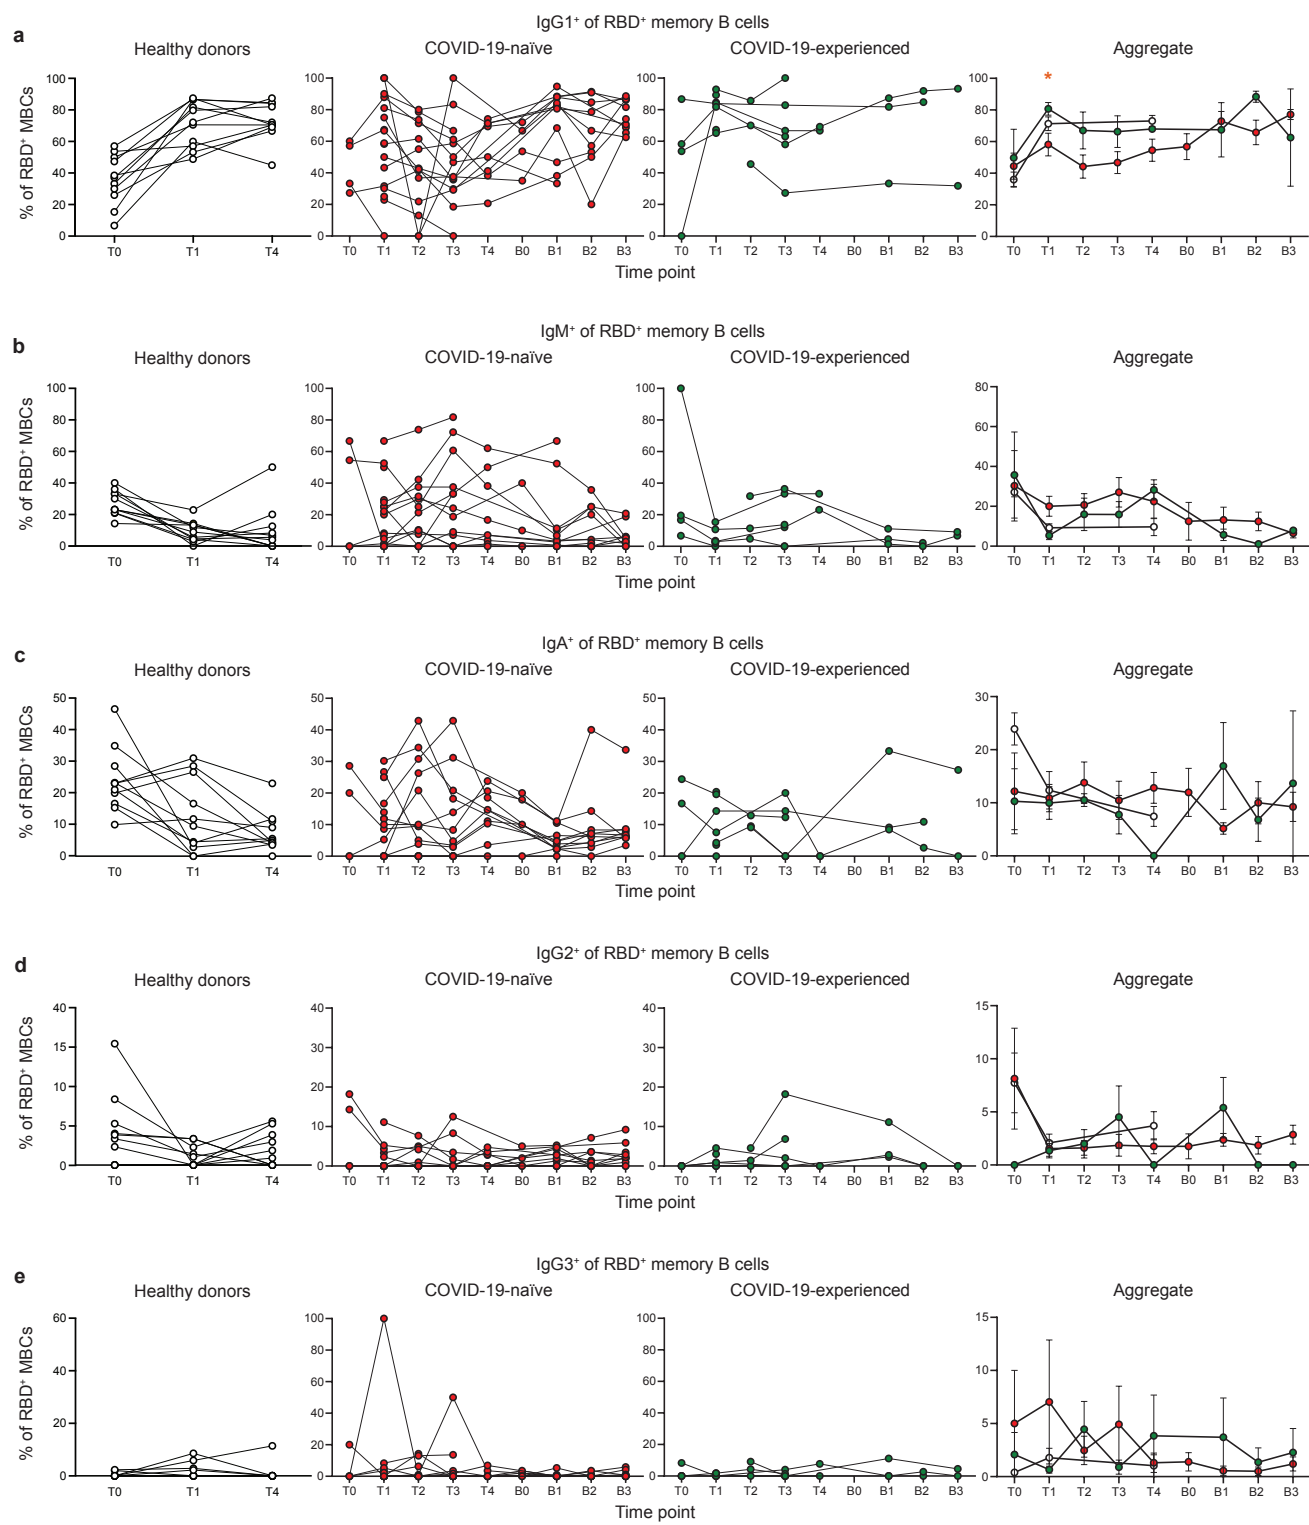

**Figure S4**

166 **Figure S4. Isotype composition of SARS-CoV-2 RBD-specific memory B cell response**  
167 **following vaccination in PAD patients.** (a) Percentage of RBD<sup>+</sup> memory B cells that are IgG1<sup>+</sup>  
168 in the healthy donor (left, white), COVID-19-naïve PAD (middle left, red), and COVID-19-  
169 experienced PAD (middle right, green) cohorts. Aggregate of mean percentage of IgG1<sup>+</sup> cells in  
170 all groups is shown on right. (b) Percentage of RBD<sup>+</sup> memory B cells that are IgM<sup>+</sup> in the healthy  
171 donor (left, white), COVID-19-naïve PAD (middle left, red), and COVID-19-experienced PAD  
172 (middle right, green) cohorts. Aggregate of mean percentage of IgM<sup>+</sup> cells in all groups is shown  
173 on right. (c) Percentage of RBD<sup>+</sup> memory B cells that are IgA<sup>+</sup> in the healthy donor (left, white),  
174 COVID-19-naïve PAD (middle left, red), and COVID-19-experienced PAD (middle right, green)  
175 cohorts. Aggregate of mean percentage of IgA<sup>+</sup> cells in all groups is shown on right. (d)  
176 Percentage of RBD<sup>+</sup> memory B cells that are IgG2<sup>+</sup> in the healthy donor (left, white), COVID-19-  
177 naïve PAD (middle left, red), and COVID-19-experienced PAD (middle right, green) cohorts.  
178 Aggregate of mean percentage of IgG2<sup>+</sup> cells in all groups is shown on right. (e) Percentage of  
179 RBD<sup>+</sup> memory B cells that are IgG3<sup>+</sup> in the healthy donor (left, white), COVID-19-naïve PAD  
180 (middle left, red), and COVID-19-experienced PAD (middle right, green) cohorts. Aggregate of  
181 mean percentage of IgG3<sup>+</sup> cells in all groups is shown on right. Statistical analyses were  
182 performed using a two-way ANOVA (for trends found between groups in the aggregate graphs)  
183 with Fisher's least significant difference testing. On the aggregate graphs, error bars were  
184 calculated based on the standard error of the mean. Above the aggregate graphs, an orange  
185 asterisk indicates a comparison between the COVID-19-naïve and COVID-19-experienced  
186 groups (\*,  $p < 0.05$ ).  
187

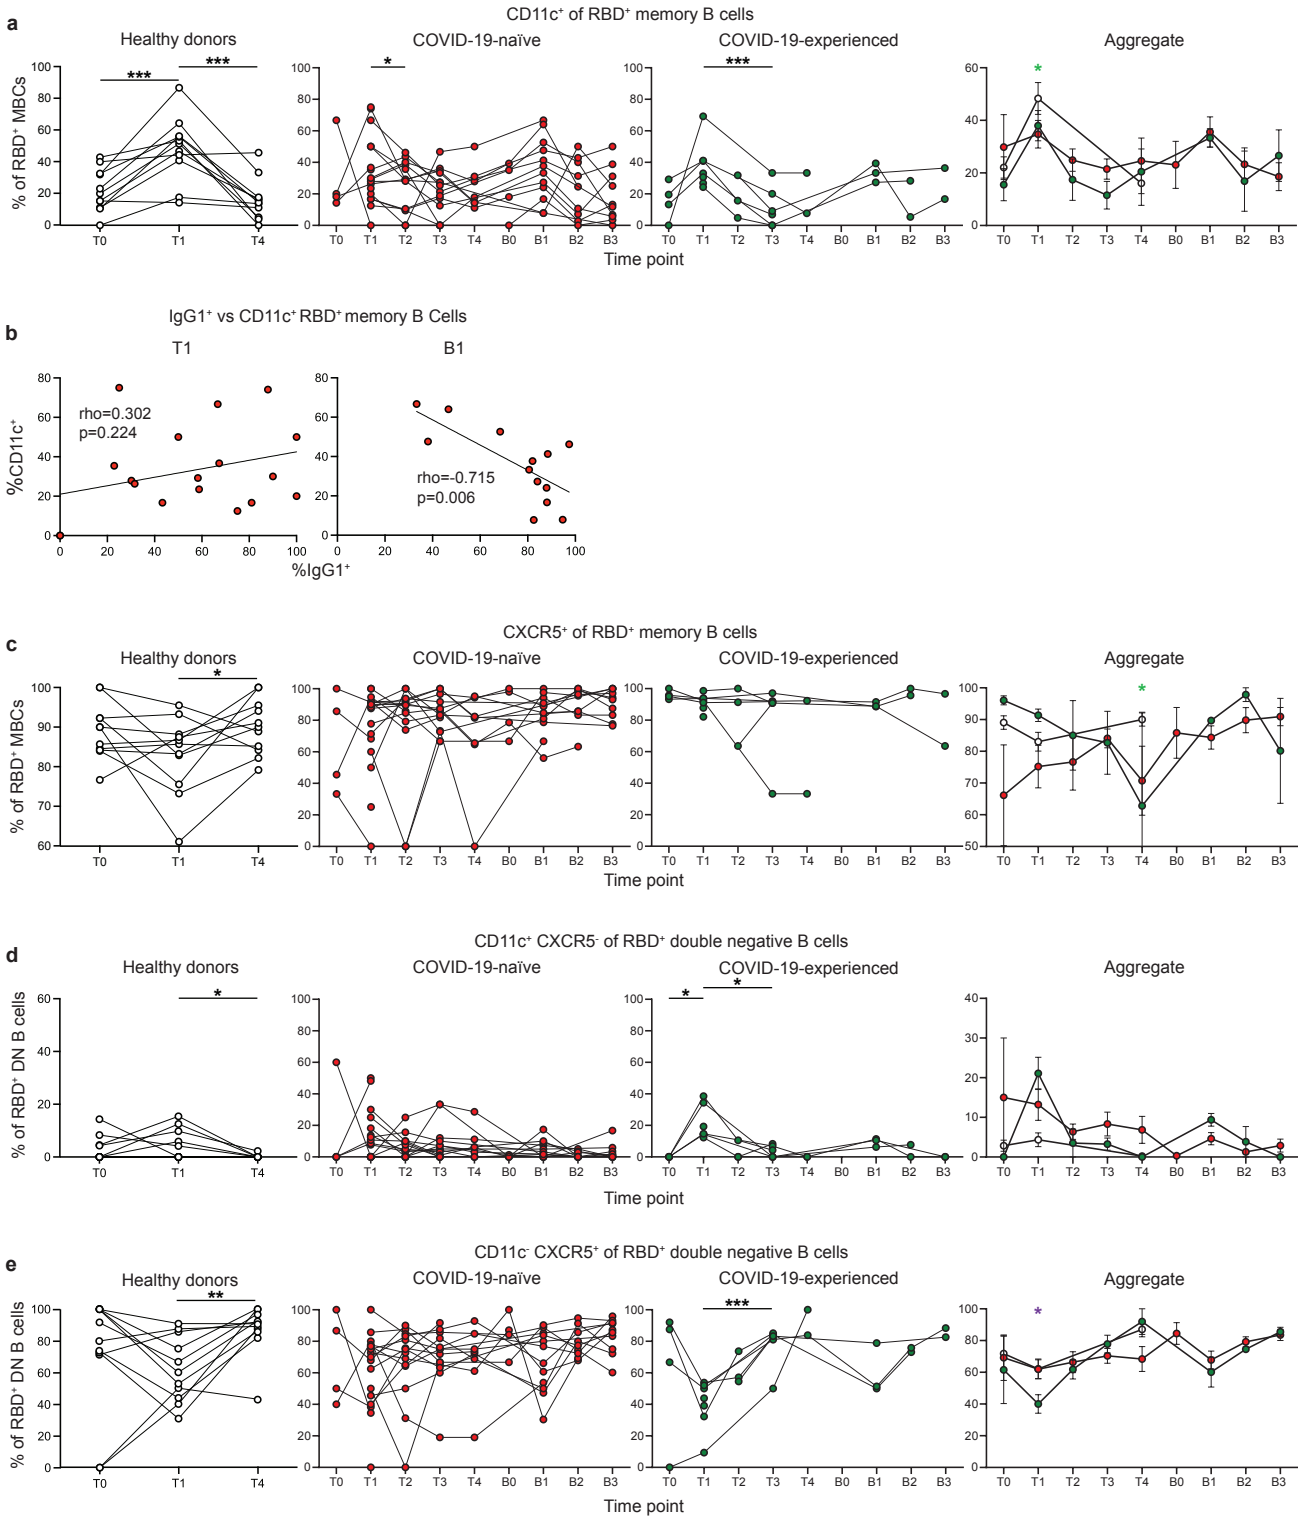

**Figure S5**

188 **Figure S5. RBD-specific memory B cells from PAD patients display reduced CD11c**  
189 **expression class.** (a) Percentage of RBD<sup>+</sup> memory B cells that are CD11c<sup>+</sup> in the healthy  
190 donor (left, white), COVID-19-naïve PAD (middle left, red), and COVID-19-experienced PAD  
191 (middle right, green) cohorts. Aggregate of mean percentage of CD11c<sup>+</sup> cells in all groups is  
192 shown on right. (b) Correlation between percentage of RBD<sup>+</sup> memory B cells that are IgG1<sup>+</sup> and  
193 CD11c<sup>+</sup> at T1 (left) or B1 (right). Associations for **b** are calculated using Pearson rank  
194 correlation and are shown with Pearson trend lines for visualization. (c) Percentage RBD<sup>+</sup>  
195 memory B cells that are CXCR5<sup>+</sup> in the healthy donor (left, white), COVID-19-naïve PAD  
196 (middle left, red), and COVID-19-experienced PAD (middle right, green) cohorts. Aggregate of  
197 mean percentage of CXCR5<sup>+</sup> cells in all groups is shown on right. (d) Percentage of RBD<sup>+</sup>  
198 double negative B cells that are CD11c<sup>+</sup> CXCR5<sup>-</sup> in the healthy donor (left, white), COVID-19-  
199 naïve PAD (middle left, red), and COVID-19-experienced PAD (middle right, green) cohorts.  
200 Aggregate of mean percentage of are CD11c<sup>+</sup> CXCR5<sup>-</sup> cells in all groups is shown on right. (e)  
201 Percentage of RBD<sup>+</sup> double negative B cells that are CD11c<sup>-</sup> CXCR5<sup>+</sup> in the healthy donor (left,  
202 white), COVID-19-naïve PAD (middle left, red), and COVID-19-experienced PAD (middle right,  
203 green) cohorts. Aggregate of mean percentage of are CD11c<sup>-</sup> CXCR5<sup>+</sup> cells in all groups is  
204 shown on right. Statistical analyses in a, c-e were performed using mixed effects model (for  
205 trends found between time points) or a two-way ANOVA (for trends found between groups in the  
206 aggregate graphs) with Fisher's least significant difference testing. Significance testing between  
207 time points was limited to comparisons relative to T1. On the aggregate graphs, error bars were  
208 calculated based on the standard error of the mean. Above the aggregate graphs, a green  
209 asterisk indicates a comparison between the COVID-19-naïve and healthy donor groups, a  
210 purple asterisk indicates a comparison between the COVID-19-experienced and healthy donor  
211 groups (\*,  $p < 0.05$ ; \*\*,  $p < 0.01$ ; \*\*\*,  $p < 0.001$ ).

| Patient Number | Age range | Sex | Vaccine Type | Booster Type | Diagnosis     | COVID-19 infection to 1st vaccine (days) |
|----------------|-----------|-----|--------------|--------------|---------------|------------------------------------------|
| 101            | 56-60     | F   | Pfizer       | Pfizer       | CVID          | --                                       |
| 102            | 21-25     | F   | Pfizer       | Pfizer       | CVID          | --                                       |
| 103            | 56-60     | F   | Pfizer       | --           | CVID          | --                                       |
| 104            | 41-45     | F   | Pfizer       | Pfizer       | CVID          | --                                       |
| 105            | 26-30     | M   | Pfizer       | Pfizer       | CVID          | --                                       |
| 106            | 61-65     | F   | Pfizer       | --           | CVID          | --                                       |
| 107            | 71-75     | F   | Pfizer       | Pfizer       | SAB           | 96                                       |
| 108            | 61-65     | F   | Pfizer       | Pfizer       | CVID          | --                                       |
| 109            | 36-40     | F   | J&J          | Pfizer       | SAB           | --                                       |
| 110            | 46-50     | F   | Pfizer       | Pfizer       | CVID          | --                                       |
| 111            | 56-60     | F   | Pfizer       | Pfizer       | CVID          | --                                       |
| 112            | 41-45     | M   | Moderna      | Moderna      | CVID          | --                                       |
| 114            | 31-35     | F   | Pfizer       | --           | SAB           | 90                                       |
| 115            | 16-20     | F   | Moderna      | --           | CVID          | 181                                      |
| 116            | 26-30     | F   | J&J          | --           | SAB           | --                                       |
| 117            | 81-85     | F   | Moderna      | --           | CVID          | --                                       |
| 118            | 61-65     | F   | Moderna      | --           | CVID          | --                                       |
| 119            | 21-25     | F   | Pfizer       | Pfizer       | Hypogam       | 276                                      |
| 120            | 41-45     | F   | Moderna      | Moderna      | CVID          | --                                       |
| 121            | 66-70     | F   | Pfizer       | Pfizer       | SAB           | --                                       |
| 122            | 46-50     | F   | Pfizer       | --           | CVID          | 117                                      |
| 123            | 66-70     | F   | Pfizer       | Pfizer       | Hypogam       | --                                       |
| 124            | 51-55     | F   | Moderna      | --           | CVID          | 222                                      |
| 125            | 56-60     | F   | Moderna      | --           | Hypogam       | 106                                      |
| 126            | 56-60     | M   | J&J          | Pfizer       | CVID          | --                                       |
| 127            | 56-60     | F   | Pfizer       | Pfizer       | CVID          | --                                       |
| 128            | 61-65     | F   | Pfizer       | Pfizer       | Hypogam       | --                                       |
| 129            | 36-40     | F   | Pfizer       | Pfizer       | CVID          | --                                       |
| 130            | 46-50     | F   | Moderna      | Moderna      | SAB           | 144                                      |
| 131            | 26-30     | F   | Pfizer       | --           | CVID          | 36                                       |
| 368-05         | 36-40     | M   | Pfizer       | --           | Healthy donor | --                                       |
| 368-17         | 36-40     | M   | Pfizer       | --           | Healthy donor | --                                       |
| 368-24         | 51-55     | F   | Pfizer       | --           | Healthy donor | --                                       |
| 368-25         | 41-45     | F   | Pfizer       | --           | Healthy donor | --                                       |
| 368-27         | 46-50     | M   | Pfizer       | --           | Healthy donor | --                                       |
| 368-29         | 26-30     | F   | Pfizer       | --           | Healthy donor | --                                       |
| 368-34         | 26-30     | M   | Pfizer       | --           | Healthy donor | --                                       |
| 368-36         | 46-50     | F   | Pfizer       | --           | Healthy donor | --                                       |
| 368-37         | 41-45     | M   | Pfizer       | --           | Healthy donor | --                                       |
| 368-38         | 41-45     | F   | Pfizer       | --           | Healthy donor | --                                       |
| 368-40         | 31-35     | F   | Pfizer       | --           | Healthy donor | --                                       |

**Table S1. Characteristics of patient cohort**

F, female; M, male; CVID, common variable immune deficiency; hypogam, hypogammaglobulinemia; SAB, specific antibody deficiency disorder.

| Patient Number | B cells (% of Live) | IgD <sup>lo</sup> (% of CD19 <sup>+</sup> ) | IgD <sup>lo</sup> CD27 <sup>+</sup> (% of CD19 <sup>+</sup> ) | CD3 <sup>+</sup> T cells (% of Live) | CD4 <sup>+</sup> T cells (% of CD3 <sup>+</sup> ) | CD8 <sup>+</sup> T cells (% of CD3 <sup>+</sup> ) | CD4 <sup>+</sup> /CD8 <sup>+</sup> Ratio |
|----------------|---------------------|---------------------------------------------|---------------------------------------------------------------|--------------------------------------|---------------------------------------------------|---------------------------------------------------|------------------------------------------|
| 101            | 4.07                | 34.3                                        | 18.8                                                          | 34.6                                 | 57.6                                              | 10                                                | 5.76                                     |
| 102            | 5.21                | 12.5                                        | 5.16                                                          | 28.3                                 | 47.4                                              | 28.2                                              | 1.68                                     |
| 103            | 4.74                | 11.7                                        | 4.61                                                          | 50.2                                 | 51.4                                              | 24.5                                              | 2.10                                     |
| 104*           | 2.9                 | 7.81                                        | 0.53                                                          | 7.72                                 | 44.2                                              | 13.2                                              | 3.35                                     |
| 105            | 4.21                | 11.4                                        | 5.51                                                          | 10.3                                 | 32.4                                              | 26.1                                              | 1.24                                     |
| 106*           | 6.13                | 5.63                                        | 1.68                                                          | 12.7                                 | 52.9                                              | 8.48                                              | 6.24                                     |
| 107            | 3.02                | 27.1                                        | 15.1                                                          | 17.1                                 | 42.9                                              | 18.9                                              | 2.27                                     |
| 108            | 4.42                | 30.6                                        | 17.1                                                          | 11.8                                 | 45.7                                              | 15.1                                              | 3.03                                     |
| 109            | 9.89                | 12.8                                        | 8.27                                                          | 16.5                                 | 48.6                                              | 16.9                                              | 2.88                                     |
| 110            | 3.61                | 32                                          | 18.1                                                          | 18.1                                 | 49.3                                              | 18                                                | 2.74                                     |
| 111            | 4.01                | 44.5                                        | 34.5                                                          | 15.2                                 | 47.8                                              | 16                                                | 2.99                                     |
| 112*           | 8.5                 | 10.7                                        | 1.53                                                          | 14.9                                 | 34.6                                              | 36.5                                              | 0.95                                     |
| 114            | 6.65                | 30.9                                        | 20.1                                                          | 24.9                                 | 56.4                                              | 16.3                                              | 3.46                                     |
| 115            | 6.78                | 24.6                                        | 18.1                                                          | 15                                   | 43.6                                              | 22.9                                              | 1.90                                     |
| 116            | 1.61                | 18.8                                        | 11.9                                                          | 15.7                                 | 38.1                                              | 27.3                                              | 1.40                                     |
| 117            | 4.45                | 14.5                                        | 4.97                                                          | 17.2                                 | 50.1                                              | 4.8                                               | 10.4                                     |
| 118            | 4.67                | 14.7                                        | 10.3                                                          | 17.6                                 | 46.5                                              | 15.6                                              | 2.98                                     |
| 119            | 4.95                | 22.8                                        | 11.9                                                          | 15.3                                 | 47.5                                              | 17.4                                              | 2.73                                     |
| 120            | 6.99                | 31.7                                        | 11.9                                                          | 17.6                                 | 46.1                                              | 11.3                                              | 4.08                                     |
| 121            | 7.43                | 21.8                                        | 18.2                                                          | 19.6                                 | 54.9                                              | 8.01                                              | 6.85                                     |
| 122            | 6.54                | 48.9                                        | 11                                                            | 18.6                                 | 39.9                                              | 9.3                                               | 4.29                                     |
| 123            | 8.75                | 10.9                                        | 39.8                                                          | 17.6                                 | 55                                                | 5.18                                              | 10.6                                     |
| 124            | 8.08                | 17.9                                        | 4.09                                                          | 17.2                                 | 48.6                                              | 21.5                                              | 2.26                                     |
| 125            | 10.1                | 13.3                                        | 11.3                                                          | 19.9                                 | 50.3                                              | 21.5                                              | 2.34                                     |
| 126*           | 5.89                | 11.4                                        | 6.62                                                          | 17.7                                 | 48.5                                              | 14                                                | 3.46                                     |
| 127            | 4.92                | 17.1                                        | 4.82                                                          | 19.6                                 | 56.7                                              | 16.4                                              | 3.46                                     |
| 128            | 2.77                | 29.5                                        | 3.09                                                          | 16.3                                 | 44.9                                              | 19.9                                              | 2.26                                     |
| 129            | 8.45                | 8.89                                        | 20.8                                                          | 17.5                                 | 44.1                                              | 26.6                                              | 1.66                                     |
| 130            | 6.74                | 33.9                                        | 3.54                                                          | 18.4                                 | 46                                                | 27.2                                              | 1.69                                     |
| 131            | 4.43                | 8.39                                        | 25.3                                                          | 12.7                                 | 39.1                                              | 31.2                                              | 1.25                                     |
| 368-05         | 10.7                | 12.3                                        | 8.52                                                          | 30.8                                 | 47.3                                              | 32                                                | 1.48                                     |
| 368-17         | 8.85                | 25.1                                        | 15.1                                                          | 19.9                                 | 57.5                                              | 8.68                                              | 6.62                                     |
| 368-24         | 7.82                | 16.3                                        | 11.8                                                          | 28.7                                 | 60.8                                              | 12.1                                              | 5.02                                     |
| 368-25         | 13.1                | 22.9                                        | 17.3                                                          | 21                                   | 48.9                                              | 10.4                                              | 4.70                                     |
| 368-27         | 3.12                | 24.8                                        | 22.4                                                          | 44.5                                 | 33.3                                              | 22.3                                              | 1.49                                     |
| 368-29         | 8.19                | 21.3                                        | 14.1                                                          | 26.6                                 | 48.3                                              | 19.2                                              | 2.52                                     |
| 368-34         | 15.7                | 8.93                                        | 6.25                                                          | 33.6                                 | 43.7                                              | 11.3                                              | 3.87                                     |
| 368-36         | 6.64                | 20.8                                        | 16                                                            | 24.2                                 | 54                                                | 16.3                                              | 3.31                                     |
| 368-37         | 6.88                | 23.9                                        | 18.5                                                          | 22.6                                 | 48.4                                              | 6.98                                              | 6.93                                     |
| 368-38         | 7.05                | 7.13                                        | 4.5                                                           | 11.7                                 | 44.7                                              | 10.1                                              | 4.43                                     |
| 368-40         | 9.09                | 27.1                                        | 17.6                                                          | 24.3                                 | 48.2                                              | 16                                                | 3.01                                     |

**Table S2. Cellular phenotype of patient cohort**

\* Patients classified as non-responders (IgD<sup>lo</sup> Spike<sup>+</sup> B cell response <0.02% of total B cells at day 7 to 28 post vaccination).



| Patient number      | Most Recent CBC                             |                                           | Lymphocyte Subpopulation at the Time of Diagnosis             |                                        |                                       |                                       |                                      | Immunoglobulin levels at the Time of Diagnosis |                       |                       | Most Recent IgG |
|---------------------|---------------------------------------------|-------------------------------------------|---------------------------------------------------------------|----------------------------------------|---------------------------------------|---------------------------------------|--------------------------------------|------------------------------------------------|-----------------------|-----------------------|-----------------|
|                     | WBC                                         | ALC                                       | CD3                                                           | CD4                                    | CD8                                   | CD19                                  | CD16/56                              | IgG                                            | IgA                   | IgM                   |                 |
| <b>Normal range</b> | <b>3.8 - 9.9 (1000s per mm<sup>3</sup>)</b> | <b>1,000 - 3,300 (per mm<sup>3</sup>)</b> | <b>661 - 1963 (per mm<sup>3</sup>)</b>                        | <b>490 - 1294 (per mm<sup>3</sup>)</b> | <b>187 - 781 (per mm<sup>3</sup>)</b> | <b>110 - 488 (per mm<sup>3</sup>)</b> | <b>76 - 467 (per mm<sup>3</sup>)</b> | <b>700 - 1600 mg/dL</b>                        | <b>75 - 400 mg/dL</b> | <b>40 - 230 mg/dL</b> | <b>mg/dL</b>    |
| 101                 | 5.8                                         | 2400                                      | 2118                                                          | 1668                                   | 470                                   | 283                                   | 258                                  | 477                                            | 53                    | 62                    | 1065            |
| 102                 | 4                                           | 1000                                      | 895                                                           | 426                                    | 432                                   | 227                                   | 127                                  | 560                                            | 62                    | 24                    | 1134            |
| 103                 | 4.5                                         | 1674                                      | 1450                                                          | 934                                    | 456                                   | 187                                   | 180                                  | 566                                            | 140                   | 106                   | 828             |
| 104*                | 5.1                                         | 1000                                      | 818                                                           | 601                                    | 193                                   | 251                                   | 18                                   | <40                                            | <4                    | <5                    | 725             |
| 105                 | 12                                          | 1500                                      | 974                                                           | 384                                    | 487                                   | 280                                   | 221                                  | <300                                           | <10                   | <25                   | 947             |
| 106*                | 7.2                                         | 1600                                      | --                                                            | --                                     | --                                    | --                                    | --                                   | 432                                            | 89                    | 95                    | 830             |
| 107                 | 6.5                                         | 1900                                      | 1109                                                          | 775                                    | 294                                   | 80                                    | 88                                   | 514                                            | 72                    | 165                   | 505             |
| 108                 | 9.5                                         | 3500                                      | Reported normal in immunology clinic note                     |                                        |                                       |                                       |                                      | 529                                            | 188                   | 35                    | 938             |
| 109                 | 6.4                                         | 1100                                      | --                                                            | --                                     | --                                    | --                                    | --                                   | 895                                            | 142                   | 105                   | 1345            |
| 110                 | 4.8                                         | 1700                                      | 1632                                                          | 859                                    | 738                                   | 184                                   | 59                                   | 1304                                           | 82                    | 37                    | 1462            |
| 111                 | 5.2                                         | 860                                       | --                                                            | --                                     | --                                    | --                                    | --                                   | 465                                            | --                    | --                    | 836             |
| 112*                | 4.3                                         | 1000                                      | 1162                                                          | 375                                    | 663                                   | 134                                   | 151                                  | 1850                                           | <25                   | <19                   | 1303            |
| 114                 | 8.3                                         | 1900                                      | 1702                                                          | 1054                                   | 547                                   | 243                                   | 41                                   | 911                                            | 221                   | 58                    | 1291            |
| 115                 | 15.6                                        | 2400                                      | --                                                            | --                                     | --                                    | --                                    | --                                   | 340                                            | 12                    | reported nl           | 1261            |
| 116                 | 8                                           | 2400                                      | 1974                                                          | 1167                                   | 690                                   | 262                                   | 71                                   | 983                                            | 162                   | 52                    | 983             |
| 117                 | 5.4                                         | 1600                                      | 2194                                                          | 1646                                   | 549                                   | 462                                   | 144                                  | 553                                            | 175                   | 49                    | 1143            |
| 118                 | 7.3                                         | 1700                                      | Reported normal in immunology clinic note                     |                                        |                                       |                                       |                                      | 647                                            | <4                    | <5                    | 758             |
| 119                 | 5                                           | 2200                                      | 2055                                                          | 1396                                   | 790                                   | 211                                   | 79                                   | 473                                            | 120                   | 167                   | 877             |
| 120                 | 8.3                                         | 2600                                      | 1848                                                          | 1282                                   | 501                                   | 157                                   | 199                                  | 528                                            | 136                   | 155                   | 1164            |
| 121                 | 6.2                                         | 2400                                      | 859                                                           | 716                                    | 119                                   | 95                                    | 227                                  | 622                                            | 133                   | 137                   | 989             |
| 122                 | 10.6                                        | 2720                                      | 3300                                                          | 2274                                   | 1026                                  | 580                                   | 446                                  | 606                                            | 204                   | 30                    | 743             |
| 123                 | 8                                           | 1500                                      | 1055                                                          | 835                                    | 205                                   | 315                                   | 158                                  | 665                                            | 162                   | 45                    | 887             |
| 124                 | 9.1                                         | 1190                                      | Reported low NK cells only in immunology clinic note          |                                        |                                       |                                       |                                      | 502                                            | 42                    | 95                    | 547             |
| 125                 | 4.9                                         | 2000                                      | 1837                                                          | 1086                                   | 725                                   | 475                                   | 308                                  | 656                                            | 270                   | 10                    | 657             |
| 126*                | 4.5                                         | 1600                                      | Reported low CD19 at 39, all others normal in immunology note |                                        |                                       |                                       |                                      | <200                                           | 66                    | <25                   | 860             |
| 127                 | 3.8                                         | 1400                                      | 925                                                           | 638                                    | 287                                   | 64                                    | 43                                   | 516                                            | <25                   | 521                   | 781             |
| 128                 | 7.2                                         | 800                                       | 655                                                           | 389                                    | 236                                   | 209                                   | 78                                   | 629                                            | 196                   | 80                    | 990             |
| 129                 | 5                                           | 1420                                      | --                                                            | --                                     | --                                    | --                                    | --                                   | 261                                            | <10                   | <25                   | 1240            |
| 130                 | 6.27                                        | 1610                                      | --                                                            | --                                     | --                                    | --                                    | --                                   | 814                                            | 99                    | 198                   | 1145            |
| 131                 | 10.79                                       | 1700                                      | --                                                            | --                                     | --                                    | --                                    | --                                   | 346                                            | <10                   | <25                   | 1036            |

**Table S3. PAD patient laboratory values**

CBC - complete blood count; WBC - white blood count, ALC - absolute lymphocyte count; Ig - immunoglobulin; dL - deciliter. Empty cells (dashed lines) indicate that the test was not performed.

\* Patients classified as non-responders (IgDlo Spike+ B cell response <0.02% of total B cells at day 7 to 28 post vaccination).

| Patient | <i>S. pneumoniae</i><br>Titer** | Tetanus<br>Titer<br>IU/ml**** | Diphtheria<br>Titer<br>IU/ml**** |
|---------|---------------------------------|-------------------------------|----------------------------------|
| 101     | 8/23                            | N/A                           | --                               |
| 102     | 7/23                            | 0.51                          | --                               |
| 103     | 10/23                           | Positive                      | Positive                         |
| 104*    | 0/23                            | Positive                      | --                               |
| 105     | 0/23***                         | Negative                      | --                               |
| 106*    | 4/13                            | 4.59                          | --                               |
| 107     | 14/23                           | 0.97                          | 0.09                             |
| 108     | 2/23                            | 0.06                          | 0.01                             |
| 109     | 6/23                            | >7                            | 2.34                             |
| 110     | 5/23                            | N/A                           | --                               |
| 111     | 9/14                            | 0.98                          | --                               |
| 112*    | ---                             | N/A                           | --                               |
| 114     | 12/23                           | 1.56                          | --                               |
| 115     | Unprotective                    | --                            | --                               |
| 116     | 14/23                           | 0.36                          | Positive                         |
| 117     | 11/23                           | 0.01                          | --                               |
| 118     | --                              | --                            | --                               |
| 119     | 19/23                           | 0.45                          | --                               |
| 120     | 14/23                           | >2.24                         | --                               |
| 121     | 8/23                            | 0.46                          | --                               |
| 122     | 10/23                           | 0.72                          | --                               |
| 123     | 20/23                           | >2.24                         | --                               |
| 124     | 2/24                            | --                            | --                               |
| 125     | 7/23                            | 2.2                           | --                               |
| 126*    | 3/24***                         | 0.24                          | Undetectable                     |
| 127     | 0/13                            | --                            | --                               |
| 128     | 14/23                           | 0.87                          | 0.07                             |
| 129     | Unprotective                    | --                            | --                               |
| 130     | 0/23                            | 2.75                          | --                               |
| 131     | --                              | 1.73                          | 0.35                             |

**Table S4. PAD patient responses to other vaccine antigens at the time of diagnosis**

IU - international unit. N/A - data was obtained but not available in the medical record. Dashed lines indicate that the test was not performed.

\* Patients classified as non-responders (IgDlo Spike+ B cell response <0.02% of total B cells at day 7 to 28 post vaccination).

\*\* Indicates the number of tested anti-*Streptococcus pneumoniae* serotypes with a level above 1.3 µg/ml for ≥17 tested serotypes.

\*\*\* Pre-pneumovax booster values; patient started on immunoglobulin replacement prior to post-booster recheck.

\*\*\*\* A value of ≥ 0.01 IU/ml is considered positive. In some records, a positive notation was indicated but no value was provided.
